# Supplementary material for: Regulation of Myc transcription by an enhancer cluster dedicated to pluripotency and early embryonic expression
Source: Nat Commun. 2024 May 10;15:3931. doi: 10.1038/s41467-024-48258-5 (PMC11087473; doi:10.1038/s41467-024-48258-5)
Supplement: Supplementary file 4 — Source Data [file 41467_2024_48258_MOESM4_ESM.xlsx]

## Sheet: Figure 2i
GFP	TFP
9.799	6.285
14.253	7.544
10.303	6.418
21.453	8.358
11.572	7.729
6.159	4.162
13.213	6.75
16.24	7.678
6.886	4.893
7.039	4.944
15.135	9.252
11.702	6.449
6.744	4.784
9.348	5.32
13.226	7.634
15.518	6.751
16.33	5.789
18.01	9.211
6.792	4.56
17.619	8.017
12.399	10.331
15.773	10.973
9.981	7.785
6.932	5.255
10.974	7.224
15.662	8.795
7.064	5.238
11.535	7.889
18.615	9.607
8.168	6.17
8.57	4.544
8.62	6.62
9.806	6.756
10.135	6.416
10.575	5.59
15.045	8.714
5.762	7.966
5.834	3.772
13.109	6.625
16.679	7.435
11.607	6.345
17.607	7.945
7.642	5.2
12.433	6.99
11.71	6.553
9.784	6.38
10.52	7.325
15.328	8.415
12.36	7.649
6.232	4.508
7.604	6.763
10.014	6.101
13.327	6.968
15.129	8.35
9.65	7.161
6.827	4.536
9.573	6.082
5.942	4.741
8.355	5.84
18.72	8.169
12.534	6.452
15.367	8.293
16.147	6.932
11.965	7.575
11.524	4.828
9.017	9.004
7.415	6.011
9.349	6.003
10.491	5.618
7.069	4.858
9.419	5.928
19.725	8.421
10.277	6.397
14.682	8.214
15.916	8.446
13.687	6.997
14.126	7.367
18.847	8.751
16.767	8.225
10.065	5.429
10.298	6.332
7.721	5.723
17.481	8.846
16.89	6.389
15.814	8.505
16.328	9.509
20.995	14.711
14.382	7.171
12.62	7.157
15.441	7.824
12.403	7.082
19.029	11.253
16.383	9.105
7.106	5.401
6.157	5.507
8.295	5.811
8.959	5.742
26.481	12.708
30.436	11.275
10.463	8.262
10.661	6.901
9.272	6.034
11.93	7.57
8.424	6.532
18.453	7.901
6.036	4.67
7.278	4.96
19.217	11.223
19.413	8.956
8.511	6.25
13.476	7.073
7.409	6.039
6.695	5.443
5.989	4.725
11.533	5.124
7.731	5.104
7.186	5.809
9.817	6.125
7.437	5.003
7.749	5.344
13.476	6.365
6.935	5.274
11.807	6.874
15.944	7.293
8.555	4.846
11.888	6.697
9.711	5.664
11.246	6.942
8.191	5.6
8.252	6.412
15.739	8.475
20.921	11.337
11.388	6.2
15.694	9.15
9.039	6.24
9.648	5.633
17.365	9.489
8.733	5.424
22.712	11.371
15.567	8.297
22.581	9.106
8.325	5.7
9.092	7.921
13.264	7.256
7.977	5.421
13.847	7.724
7.395	6.218
16.358	7.878
19.599	10.747
16.693	7.572
13.205	8.489
16.342	8.021
11.515	6.88
6.684	5.797
9.314	7.237
9.914	6.249
5.785	4.968
11.895	5.65
15.453	7.744
16.438	9.255
10.1	5.22
12.718	8.614
9.662	7.015
11.701	6.895
14.06	10.382
11.097	8.158
23.647	9.226
7.516	5.374
10.386	7.382
15.026	9.082
10.422	5.529
8.867	7.759
7.67	5.093
18.95	9.757
31.043	15.33
9.401	5.783
9.475	6.662
18.623	9.422
6.607	4.852
10.817	4.873
13.247	6.721
10.79	6.826
15.85	8.847
10.42	6.984
13.97	8.961
20.125	11.443
8.225	5.479
7.042	5.594
10.105	6.966
9.744	6.346
20.641	8.545
16.154	6.99
14.577	6.92
10.469	6.699
12.775	7.041
14.936	7.315
16.353	9.161
9.513	6.317
12.633	8.086
13.284	9.679
11.506	9.985
10.737	6.189
12.361	8.738
25.941	10.265
6.358	4.851
10.375	6.571
10.651	6.058
12.337	7.102
11.915	7.051
11.876	5.826
13.994	8.505
17.057	8.366
16.998	14.678
16.443	13.045
9.095	6.073
10.021	7.768
15.774	7.543
9.402	6.604
16.974	7.462
11.795	6.952
10.534	6.417
7.92	5.259
12.47	5.273
19.926	8.905
11.602	6.784
12.922	6.493
15.988	8.106
15.481	9.731
15.497	8.342
15.568	8.413
14.763	9.139
14.598	6.419
11.485	6.356
10.05	6.496
11.882	7.197
13.591	4.963
10.834	6.87
9.165	6.05
14.977	10.992
14.194	9.753
9.003	5.652
10.196	6.701
17.153	10.847
14.601	7.608
14.551	4.583
9.142	6.579
7.699	7.213
16.679	7.55
18.149	7.988
10.157	8.453
15.094	7.988
7.27	5.343
15.265	9.177
11.538	6.865
18.661	9.912
11.635	6.269
9.132	5.675
9.494	5.662
9.668	5.674
11.324	6.976
13.195	6.984
23.307	9.778
12.987	6.827
12.733	7.958
9.165	7.11
13.65	5.401
9.586	5.892
6.766	5.448
13.103	7.287
13.422	7.939
24.169	8.869
15.774	6.638
15.381	8.022
11.815	7.828
14.427	10.088
14.972	11.632
12.567	7.463
13.114	11.17
16.755	8.423
7.216	6.995
19.834	6.739
18.207	10.978
8.686	7.184
12.05	6.844
9.419	5.989
7.764	6.45
12.078	5.501
16.204	8.427
18.123	10.518
17.811	9.833
14.88	10.168
14.22	9.299
12.325	6.789
9.479	6.064
9.231	6.758
23.5	13.749
9.389	6.248
19.551	7.03
15.634	5.975
8.336	5.748
11.667	7.849
13.929	9.393
17.916	8.307
9.568	6.115
8.042	5.331
6.562	4.071
12.9	8.142
10.42	4.808
21.918	10.994
9.554	6.549
13.344	6.955
15.951	8.158
12.211	6.628
20.564	10.817
16.008	8.499
13.244	7.172
14.85	7.136
13.514	6.982
21.204	11.338
15.569	7.952
11.335	7.52
20.798	8.456
12.188	6.897
8.523	4.982
8.198	4.937
12.443	8.509
16.463	8.57
22.718	8.129
11.672	6.44
15.571	8.166
13.052	5.198
15.058	7.793
13.095	6.72
16.234	8.577
14.935	6.013
8.307	5.769
9.591	6.81
18.569	8.728
15.363	9.323
10.083	6.595
12.4	8.289
8.956	5.485
17.848	8.666
11.726	7.564
8.866	6.037
9.052	6.212
14.102	7.724
13.281	7.153
8.724	5.452
7.89	5.224
10.032	7.939
10.423	6.763
18.713	10.704
9.029	6.146
17.641	7.228
13.958	10.605
12.04	6.856
17.172	9.235
10.35	7.594
10.882	6.77
13.343	6.106
14.539	7.201
9.778	6.347
11.295	6.216
9.848	5.693
21.68	12.501
18.589	8.943
12.351	7.003
8.415	5.738
16.214	9.344
10.354	5.445
7.089	4.397
6.251	4.468
10.279	6.377
15.941	8.027
7.531	5.14
20.489	7.723
8.343	5.375
17.766	7.432
10.014	6.285
9.109	5.005
9.826	6.777
15.84	7.709
8.926	5.133
10.306	6.854
13.601	7.117
10.852	7.992
11.547	5.561
14.743	5.853
10.593	6.634
15.158	8.559
9.062	5.187
8.848	6.398
14.814	7.749
10.079	6.111
7.492	6.209
10.572	5.76
14.295	7.951
18.924	5.029
14.274	9.238
11.995	8.525
8.65	5.181
11.4	7.055
7.904	5.997
11.511	6.917
7.421	5.278
10.481	6.203
17.106	9.889
13.917	7.363
11.523	6.277
9.336	6.27
18.074	8.392
19.293	10.006
9.292	6.819
12.104	7.433
10.619	6.174
13.793	8.149
23.032	10.03
9.683	5.662
10.044	6.196
14.817	9.244
16.75	8.759
8.916	7.19
15.987	9.113
10.034	6.815
11.443	7.453
8.827	5.246
8.411	5.731
9.119	5.252
10.607	8.122
13.142	7.254
10.287	7.095
9.91	7.09
5.858	4.929
12.264	6.111
7.404	5.05
9.942	6.193
22.886	11.612
8.237	5.882
22.516	10.226
11.001	6.845
10.635	6.078
7.475	6.02
16.008	7.609
15.127	6.485
29.319	12.883
6.78	4.296
15.801	9.491
6.553	5.383
8.078	5.473
16.731	8.12
11.076	6.026
13.131	6.634
10.704	5.824
8.839	5.2
10.73	7.141
7.597	5.284
6.73	4.445
9.471	5.181
5.36	4.912
14.492	8.037
9.387	5.584
10.91	5.966
15.504	6.23
9.168	5.913
6.835	5.086
11.006	6.614
14.545	7.932
16.551	7.149
8.119	5.927
8.131	4.628
11.576	7.153
7.129	5.513
11.76	5.913
6.872	4.659
17.297	7.424
8.507	6.026
8.728	5.327
18.451	8.081
11.366	6.273
11.834	7.05
12.163	7.984
8.422	5.79
16.083	6.458
20.482	10.413
14.402	7.736
17.431	9.085
11.251	7.506
9.623	5.869
11.492	7.22
9.194	5.36
11.847	5.386
11.276	6.305
11.466	7.593
7.922	5.042
9.895	6.93
17.123	8.075
13.684	6.169
9.872	6.059
7.665	5.329
13.614	6.227
8.752	5.222
8.784	5.579
10.738	5.961
9.363	6.684
16.35	9.498
11.663	6.602
10.49	7.178
11.465	5.024
10.312	5.85
6.135	5.23
14.951	6.997
12.352	8.09
7.722	6.239
15.064	8.6
12.036	7.172
20.849	11.504
12.636	6.648
12.406	4.835
14.077	7.959
12.571	6.306
13.669	5.57
11.299	6.798
4.471	4.19
11.767	7.001
12.634	10.151
12.878	10.546
10.4	4.535
11.834	7.473
9.361	4.98
10.018	6.05
15.194	10.001
16.794	8.315
24.091	10.102
9.426	7.252
8.364	6.378
8.514	6.346
11.514	6.395
9.075	5.715
11.068	6.138
11.278	5.586
14.261	7.882
17.994	8.516
7.824	5.3
9.589	6.844
8.468	6.528
12.838	4.739
16.703	7.64
9.113	5.815
14.064	10.516
15.979	8.054
18.048	9.138
9.048	5.715
9.799	6.276
8.946	6.807
18.752	8.361
18.489	7.633
9.998	5.556
16.748	8.007
10.496	4.992
12.916	8.67
14.136	8.344
14.629	7.558
9.012	5.771
17.943	7.697
10.788	7.299
10.393	7.15
20.692	9.701
25.445	8.152
18.386	7.752
9.099	5.164
9.479	7.236
12.496	8.012
10.81	8.051
10.066	6.409
11.649	6.888
9.993	6.077
10.912	6.831
12.312	6.525
9.747	6.212
16.797	10.797
5.298	4.271
8.617	6.13
6.902	4.991
17.02	7.485
13.368	6.874
8.653	7.769
17.442	7.23
12.647	6.755
11.903	6.819
13.043	7.752
10.188	6.387
8.169	5.724
16.405	8.063
10.855	6.901
11.202	6.619
6.629	5.429
13.145	6.756
12.902	7.498
11.719	7.094
25.161	12.3
15.008	8.525
6.884	5.488
8.911	5.433
6.338	4.785
10.396	6.803
13.29	9.011
9.828	6.545
15.484	5.44
9.968	6.266
12.245	8.26
10.951	9.638
8.216	5.895
8.551	6.071
7.142	5.343
7.373	5.568
15.456	7.581
18.093	9.868
12.21	5.511
18.079	8.135
16.116	7.823
13.061	8.278
11.17	7.435
19.027	8.003
20.428	8.635
14.409	8.932
16.232	9.688
16.959	6.922
15.505	7.646
8.704	7.735
8.898	5.963
22.741	12.592
8.273	5.951
13.813	7.759
13.709	5.227
14.712	7.752
14.61	9.963
13.427	7.465
11.146	6.865
11.829	6.339
12.925	8.085
10.831	6.839
9.719	5.765
19.293	8.506
16.281	7.799
11.848	7.289
18.906	8.654
7.536	4.557
11.488	5.521
14.511	7.548
9.773	6.881
7.5	4.552
14.091	7.294
10.286	7.033
12.762	6.592
7.998	4.893
21.982	9.331
12.19	8.043
6.271	4.522
15.343	8.109
20.725	9.449
10.507	5.864
11.744	7.888
10.966	7.077
15.446	7.304
10.306	6.461
9.164	5.733
10.53	6.074
10.867	6.078
10.283	6.804
18.268	9.232
11.316	8.498
11.141	6.508
9.859	5.746
14.784	8.058
5.767	5.78
7.785	6.159
9.834	5.948
9.934	6.681
11.35	7.416
8.872	5.297
9.322	7.983
18.127	8.349
7.37	4.476
9.281	6.434
12.955	5.991
21.927	10.68
9.297	5.638
15.687	9.282
17.117	9.463
13.778	7.362
8.777	5.823
12.039	6.684
8.036	5.64
9.714	6.553
8.876	5.807
10.7	6.301
10.689	6.51
13.983	5.526

## Sheet: Figure 2i´
GFP	TFP
13.676	7.494
7.432	5.442
11.145	5.876
11.088	6.596
7.848	4.881
10.987	8.012
10.544	7.27
10.719	6.328
9.98	5.915
8.964	5.876
9.934	6.396
10.461	6.437
9.441	6.606
8.98	6.074
7.005	5.18
12.03	8.811
10.186	5.742
7.011	4.254
9.113	6.238
8.862	5.765
9.126	5.77
9.097	5.363
10.039	6.483
9.481	5.192
7.775	5.192
7.024	4.538
12.208	6.837
7.827	5.837
14.157	8.099
8.922	4.408
8.278	5.861
7.837	6.062
10.617	6.059
7.087	4.862
12.587	5.759
15.373	8.757
16.097	8.484
9.576	6.797
10.067	6.765
10.711	6.191
11.075	6.573
8.688	5.995
11.003	7.217
12.054	6.335
13.593	7.841
9.721	6.82
10.437	7.582
12.458	6.631
9.305	6.191
13.839	8.42
10.312	8.066
6.929	5.672
7.896	5.097
9.678	6.65
9.131	7.727
8.308	6.076
7.043	5.149
11.222	8.583
12.6	6.969
7.091	4.864
5.557	5.071
10.458	6.329
6.572	4.788
13.759	7.24
7.142	4.675
8.423	6.47
7.047	4.933
6.985	4.422
11.067	7.873
6.565	4.727
10.274	6.257
6.179	4.735
8.077	5.293
6.67	5.311
6.647	4.58
6.807	4.953
6.311	4.325
9.999	6.384
6.001	4.469
9.221	7.206
5.995	3.845
11.944	7.935
5.868	3.676
6.363	4.31
6.375	4.239
6.547	5.738
9.095	5.47
7.232	3.985
13.28	8.649
8.814	5.981
7.138	4.937
7.798	4.954
10.527	5.455
9.206	6.785
7.686	5.967
7.303	5.431
4.888	2.685
8.271	5.193
6.214	4.331
10.815	7.258
7.981	6.182
6.545	4.788
10.217	6.729
19.141	11.629
9.86	6.465
9.316	8.153
10.366	6.189
6.092	3.44
13.189	9.174
11.523	7.575
6.822	5.618
6.521	5.072
13.17	9.352
7.121	5.8
11.426	6.815
6.054	5.533
5.139	4.043
5.541	4.603
7.009	4.45
9.023	5.873
11.78	8.019
8.402	7.348
5.681	4.492
5.627	3.877
7.847	5.723
6.275	4.047
4.875	4.337
10.286	6.258
8.734	6.624
6.727	5.206
19.379	8.384
6.818	4.742
5.432	4.327
7.917	6.299
10.302	7.036
7.066	4.769
6.661	4.603
5.436	4.63
9.526	5.776
6.194	4.734
7.333	5.701
7.94	4.893
8.558	6.185
7.306	4.875
6.031	5.094
8.838	6.606
9.812	7.094
9.102	7.358
7.97	6.023
7.839	7.355
8.064	5.656
7.898	4.389
5.78	5.212
8.443	5.767
8.03	6.356
7.353	4.875
7.906	5.39
7.277	5.938
9.592	6.022
8.835	6.049
6.745	5.427
8.425	5.444
9.777	5.464
7.83	5.29
8.495	5.562
7.65	5.656
9.063	6.282
6.99	4.488
5.535	4.725
7.77	5.6
6.387	3.949
6.588	5.327
19.601	6.436
7.518	5.388
9.952	6.984
6.401	4.795
8.433	5.743
7.803	4.792
9.102	5.047
5.75	4.449
9.577	6.729
13.919	10.756
7.981	5.552
9.165	5.822
8.598	5.724
6.65	4.494
4.81	3.966
10.726	5.499
6.017	4.987
11.272	6.355
5.178	4.546
7.378	5.335
12.026	6.038
8.028	5.73
9.617	6.906
6.204	4.053
9.217	7.008
8.172	7.008
12.595	7.112
8.06	5.957
9.023	6.119
12.865	7.841
14.758	8.377
8.539	6.198
6.969	6.194
8.506	6.526
5.614	5.745
9.597	6.507
7.608	5.071
5.197	5.027
7.08	4.916
6.407	5.809
6.002	4.27
8.503	5.535
12.592	7.697
10.622	5.694
7.795	4.874
7.417	5.282
8.357	6.876
6.955	5.533
8.448	5.174
10.985	6.127
8.697	6.298
8.64	6.672
8.549	5.388
10.049	9.198
8.793	8.683
11.088	6.736
7.425	6.562
8.222	6.302
5.801	4.772
8.086	5.233
8.965	7.426
7.703	6.468
12.432	7.459
7.588	5.915
5.613	4.876
7.078	6.269
7.308	5.24
10.566	8.037
8.676	5.739
7.102	4.752
6.569	5.013
7.921	5.48
8.316	6.067
13.396	8.399
4.833	4.182
7.625	6.147
7.906	5.774
14.669	8.606
7.711	6.424
8.509	6.482
6.385	4.928
7.216	5.234
6.544	4.967
6.57	4.909
8.435	5.296
7.079	5.024
8.552	5.31
8.74	5.642
11.161	6.997
6.726	6.325
7.65	5.555
8.953	6.894
8.875	5.779
6.972	5.433
7.425	4.688
6.217	4.779
10.092	6.123
13.305	7.212
9.968	6.552
7.26	4.975
8.58	5.21

## Sheet: Figure 2i´´
GFP	TFP
25.594	10.09
12.501	6.259
19.827	11.027
9.836	7.022
21.133	11.325
17.848	9.17
16.522	10.485
19.446	10.942
20.228	10.248
9.377	7.062
24.208	12.997
19.58	9.506
20.284	7.51
17.529	9.772
20.875	9.456
17.421	8.798
26.934	12.607
19.102	7.756
22.45	10.122
32.177	10.818
30.949	9.395
19.57	9.008
19.208	9.181
26.902	10.354
23.578	8.866
22.274	14.387
17.134	8.429
20.009	12.549
24.525	9.799
15.964	9.036
16.852	12.167
17.069	7.196
26.237	12.34
28.533	12.561
31.262	15.341
15.643	8.824
16.781	6.218
23.24	10.788
17.605	8.398
14.537	5.731
13.729	7.542
13.93	8.436
15.298	8.434
12.877	8.711
22.256	10.378
12.248	8.209
15.256	5.993
14.708	6.408
20.706	7.867
17.738	9.114
21.773	8.969
22.595	11.491
12.919	8.498
19.372	7.86
20.697	8.723
13.269	7.388
16.689	8.595
13.501	7.854
18.953	10.642
15.083	8.563
18.36	8.797
17.638	8.55
21.505	9.303
26.869	9.575
28.332	15.446
19.529	8.128
16.369	8.966
18.769	8.046
15.777	9.433
22.588	9.16
17.064	8.672
16.089	8.948
21.722	6.471
11.506	7.512
12.88	6.792
15.594	6.827
18.567	8.472
10.05	7.375
14.883	7.172
14.207	8.758
27.041	10.779
12.74	7.02
18.13	8.185
13.375	7.036
21.522	8.302
11.578	5.697
17.734	10.292
20.565	10.116
28.241	8.908
19.433	6.532
14.441	6.724
15.514	7.868
14.983	9.828
20.257	11.043
26.131	10.901
16.265	8.896
13.789	8.487
14.029	7.845
23.71	9.204
9.079	7.741
15.872	8.873
17.502	8.361
21.398	7.515
15.106	7.448
12.218	9.923
13.745	7.052
20.855	10.037
17.985	9.124
13.848	6.521
23.09	10.677
30.942	12.645
27.978	11.619
23.55	9.184
8.284	6.516
12.133	6.746
22.938	9.981
26.778	13.96
22.918	9.616
16.488	9.759
13.88	6.954
12.911	6.974
18.545	8.843
30.64	10.161
21.309	13.343
18.67	8.567
21.112	10.706
16.09	6.566
13.886	5.945
37.541	17.469
24.57	7.519
18.223	8.266
21.996	10.372
25.102	13.156
16.857	7.21
18.943	13.023
29.136	11.796
26.461	11.015
15.967	8.031
12.313	8.699
20.611	10.847
19.736	8.258
13.878	8.227
15.68	9.907
36.923	7.043
17.305	9.039
36.619	15.373
23.428	9.093
28.268	9.316
19.013	9.344
13.645	6.808
17.274	8.107
15.771	7.978
17.746	8.086
26.843	9.195
16.847	8.564
14.166	6.33
22.899	9.427
14.433	8.635
22.606	11.137
13.14	7.12
18.856	8.544
18.371	10.495
16.593	9.549
14.555	10.282
18.096	9.501
17.299	7.157
16.801	7.312
12.141	7.803
11.239	9.668
26.923	10.548
28.879	12.18
19.17	8.629
25.718	15.485
26.35	10.017
11.467	7.633
28.326	11.629
23.584	9.427
14.598	8.803
15.519	10.792
15.82	9.088
24.223	10.085
17.033	8.958
29.536	11.683
23.26	13.468
18.951	10.814
11.478	6.033
14.498	8.663
21.067	8.28
19.024	8.71
11.455	7.554
10.43	7.385
23.006	8.864
20.542	10.079
13.854	8.298
11.189	7.629
28.75	13.043
21.359	8.088
20.655	9.058
12.286	8.627
23.817	7.776
16.499	8.644
10.439	6.626
20.25	7.343
14.919	9.065
20.888	9.111
23.284	9.334
20.151	10.612
24.73	10.874
21.352	8.014
21.631	11.811
18.469	9.628
14.068	8.844
10.334	7.602
13.266	7.543
16.546	8.201
14.449	7.268
19.041	10.089
18.668	10.484
20.764	13.642
17.004	9.03
15.158	11.132
18.445	8.613
28.704	11.351
14.767	7.691
16.815	12.433
31.303	16.928
17.155	10.237
23.056	10.54
13.175	9.58
15.979	7.838
22.794	9.359
18.629	6.759
27.048	9.158
17.704	7.902
19.936	9.069
16.599	6.413
16.833	12.133
40.353	12.847
14.911	9.371
13.838	9.921
12.162	11.779
16.957	6.835
21.878	10.137
21.685	11.107
27.064	9.161
15.502	9.166
16.07	10.889
20.967	10.048
19.46	10.044
11.966	8.065
15.272	8.322
19.421	9.994
13.818	7.457
14.893	7.763
21.468	8.659
16.522	9.18
16.895	7.851
18.187	9.493
9.865	7.45
21.187	10.937
18.956	8.886
18.103	7.458
15.846	8.842
17.86	7.52
23.531	13.073
15.331	8.618
25.577	9.498
21.591	7.678
14.644	9.029
13.097	8.378
21.017	9.311
20.273	7.554
15.786	9.34
20.375	9.05
13.746	7.443
12.558	6.495
11.492	5.931
13.48	6.767
15.191	8.499
22.571	6.932
14.755	7.96
12.215	5.662
19.693	7.891
13.276	7.009
12.613	6.27
9.995	6.545
16.538	8.585
34.236	12.1
10.711	5.202
19.067	8.324
11.051	6.263
19.238	8.648
16.089	6.816
14.51	9.78
23.425	9.504
20.952	8.371
22.053	13.126
15.708	8.925
13.126	5.858
18.295	9.236
16.82	9.062
40.67	10.906
27.663	9.278
16.545	9.526
32.467	11.105
14.476	8.135
16.03	6.904
37.618	16.197
13.466	8.427
18.02	8.787
31.551	13.772
9.265	6.123
19.415	12.202
12.761	7.279
18.137	6.937
14.754	6.614
24.827	10.413
16.89	9.489
11.049	5.509
23.851	11.323
28.567	15.033
15.833	8.041
12.054	5.519
19.686	10.121
15.605	9.101
19.858	12.071
23.508	11.31
16.402	9.828
20.288	7.202
25.041	11.918
24.207	9.267
12.895	7.806
23.603	9.781
12.617	7.518
12.742	7.603
15.958	8.76
16.101	9.839
17.081	8.954
15.361	12.825

## Sheet: Figure 2j
GFP SR	GFP SR+2i	GFP N2B27 + F/A
8.976	13.676	25.594
13.252	7.432	12.501
10.678	11.145	19.827
11.993	11.088	9.836
11.71	7.848	21.133
9.946	10.987	17.848
10.856	10.544	16.522
9.994	10.719	19.446
7.531	9.98	20.228
9.149	8.964	9.377
7.524	9.934	24.208
15.03	10.461	19.58
10.327	9.441	20.284
12.39	8.98	17.529
10.583	7.005	20.875
12.735	12.03	17.421
8.75	10.186	26.934
10.156	7.011	19.102
8.929	9.113	22.45
13.152	8.862	32.177
5.054	9.126	30.949
8.499	9.097	19.57
10.387	10.039	19.208
11.257	9.481	26.902
9.061	7.775	23.578
12.839	7.024	22.274
8.803	12.208	17.134
10.999	7.827	20.009
8.399	14.157	24.525
24.116	8.922	15.964
6.955	8.278	16.852
7.737	7.837	17.069
9.217	10.617	26.237
13.482	7.087	28.533
6.83	12.587	31.262
8.914	15.373	15.643
19.188	16.097	16.781
8.431	9.576	23.24
10.728	10.067	17.605
5.745	10.711	14.537
9.772	11.075	13.729
20.427	8.688	13.93
8.85	11.003	15.298
14.18	12.054	12.877
14.768	13.593	22.256
7.232	9.721	12.248
8.166	10.437	15.256
8.723	12.458	14.708
9.019	9.305	20.706
10.726	13.839	17.738
11.831	10.312	21.773
9.412	6.929	22.595
10.97	7.896	12.919
8.456	9.678	19.372
9.102	9.131	20.697
8.24	8.308	13.269
12.602	7.043	16.689
11.626	11.222	13.501
6.586	12.6	18.953
13.944	7.091	15.083
5.386	5.557	18.36
10.519	10.458	17.638
9.795	6.572	21.505
7.039	13.759	26.869
8.084	7.142	28.332
10.178	8.423	19.529
16.076	7.047	16.369
9.699	6.985	18.769
6.124	11.067	15.777
7.17	6.565	22.588
13.61	10.274	17.064
8.38	6.179	16.089
5.541	8.077	21.722
8.957	6.67	11.506
15.691	6.647	12.88
11.94	6.807	15.594
5.971	6.311	18.567
10.714	9.999	10.05
6.958	6.001	14.883
13.29	9.221	14.207
8.667	5.995	27.041
12.386	11.944	12.74
9.589	5.868	18.13
9.171	6.363	13.375
16.312	6.375	21.522
11.891	6.547	11.578
7.761	9.095	17.734
8.777	7.232	20.565
10.48	13.28	28.241
15.84	8.814	19.433
11.668	7.138	14.441
12.229	7.798	15.514
11.412	10.527	14.983
10.193	9.206	20.257
6.376	7.686	26.131
7.557	7.303	16.265
15.387	4.888	13.789
7.291	8.271	14.029
13.013	6.214	23.71
12.475	10.815	9.079
14.585	7.981	15.872
7.236	6.545	17.502
8.118	10.217	21.398
11.618	19.141	15.106
9.987	9.86	12.218
7.801	9.316	13.745
15.948	10.366	20.855
8.369	6.092	17.985
8.48	13.189	13.848
10.072	11.523	23.09
10.644	6.822	30.942
9.605	6.521	27.978
9.316	13.17	23.55
8.477	7.121	8.284
11.774	11.426	12.133
17.577	6.054	22.938
9.341	5.139	26.778
13.086	5.541	22.918
11.685	7.009	16.488
19.668	9.023	13.88
6.445	11.78	12.911
7.386	8.402	18.545
17.05	5.681	30.64
19.102	5.627	21.309
8.7	7.847	18.67
11.229	6.275	21.112
5.462	4.875	16.09
15.669	10.286	13.886
10.96	8.734	37.541
12.065	6.727	24.57
15.72	19.379	18.223
8.966	6.818	21.996
19.511	5.432	25.102
8.078	7.917	16.857
9.219	10.302	18.943
15.751	7.066	29.136
12.317	6.661	26.461
11.865	5.436	15.967
18.826	9.526	12.313
6.883	6.194	20.611
17.972	7.333	19.736
7.884	7.94	13.878
11.573	8.558	15.68
17.788	7.306	36.923
18.362	6.031	17.305
10.765	8.838	36.619
7.146	9.812	23.428
13.362	9.102	28.268
9.05	7.97	19.013
15.952	7.839	13.645
8.653	8.064	17.274
10.977	7.898	15.771
18.321	5.78	17.746
15.802	8.443	26.843
9.799	8.03	16.847
14.253	7.353	14.166
10.303	7.906	22.899
21.453	7.277	14.433
11.572	9.592	22.606
6.159	8.835	13.14
13.213	6.745	18.856
16.24	8.425	18.371
6.886	9.777	16.593
7.039	7.83	14.555
15.135	8.495	18.096
11.702	7.65	17.299
6.744	9.063	16.801
9.348	6.99	12.141
13.226	5.535	11.239
15.518	7.77	26.923
16.33	6.387	28.879
18.01	6.588	19.17
6.792	19.601	25.718
17.619	7.518	26.35
12.399	9.952	11.467
15.773	6.401	28.326
9.981	8.433	23.584
6.932	7.803	14.598
10.974	9.102	15.519
15.662	5.75	15.82
7.843	9.577	24.223
5.777	13.919	17.033
11.566	7.981	29.536
13.914	9.165	23.26
13.269	8.598	18.951
17.383	6.65	11.478
14.716	4.81	14.498
13.424	10.726	21.067
7.923	6.017	19.024
22.349	11.272	11.455
15.45	5.178	10.43
5.502	7.378	23.006
11.43	12.026	20.542
13.887	8.028	13.854
13.412	9.617	11.189
12.931	6.204	28.75
10.342	9.217	21.359
16.762	8.172	20.655
7.064	12.595	12.286
11.535	8.06	23.817
18.615	9.023	16.499
8.168	12.865	10.439
8.57	14.758	20.25
8.62	8.539	14.919
9.806	6.969	20.888
10.135	8.506	23.284
10.575	5.614	20.151
15.045	9.597	24.73
5.762	7.608	21.352
5.834	5.197	21.631
13.109	7.08	18.469
16.679	6.407	14.068
11.607	6.002	10.334
17.607	8.503	13.266
7.642	12.592	16.546
12.433	10.622	14.449
11.71	7.795	19.041
9.784	7.417	18.668
10.52	8.357	20.764
15.328	6.955	17.004
12.36	8.448	15.158
6.232	10.985	18.445
7.604	8.697	28.704
10.014	8.64	14.767
13.327	8.549	16.815
15.129	10.049	31.303
9.65	8.793	17.155
6.827	11.088	23.056
9.573	7.425	13.175
5.942	8.222	15.979
8.355	5.801	22.794
18.72	8.086	18.629
12.534	8.965	27.048
15.367	7.703	17.704
16.147	12.432	19.936
11.965	7.588	16.599
11.524	5.613	16.833
9.017	7.078	40.353
7.415	7.308	14.911
9.349	10.566	13.838
10.491	8.676	12.162
7.069	7.102	16.957
9.419	6.569	21.878
19.725	7.921	21.685
10.277	8.316	27.064
14.682	13.396	15.502
15.916	4.833	16.07
13.687	7.625	20.967
14.126	7.906	19.46
18.847	14.669	11.966
16.767	7.711	15.272
10.065	8.509	19.421
10.298	6.385	13.818
7.721	7.216	14.893
17.481	6.544	21.468
16.89	6.57	16.522
15.814	8.435	16.895
7.74	7.079	18.187
6.312	8.552	9.865
9.834	8.74	21.187
16.682	11.161	18.956
12.364	6.726	18.103
8.947	7.65	15.846
13.439	8.953	17.86
11.786	8.875	23.531
11.247	6.972	15.331
12.573	7.425	25.577
7.765	6.217	21.591
8.734	10.092	14.644
14.332	13.305	13.097
21.097	9.968	21.017
11.914	7.26	20.273
13.261	8.58	15.786
13.678		20.375
11.604		13.746
8.748		12.558
6.867		11.492
9.563		13.48
16.328		15.191
20.995		22.571
14.382		14.755
12.62		12.215
15.441		19.693
12.403		13.276
19.029		12.613
16.383		9.995
7.106		16.538
6.157		34.236
8.295		10.711
8.959		19.067
26.481		11.051
30.436		19.238
10.463		16.089
10.661		14.51
9.272		23.425
11.93		20.952
8.424		22.053
18.453		15.708
6.036		13.126
7.278		18.295
19.217		16.82
19.413		40.67
8.511		27.663
13.476		16.545
7.409		32.467
6.695		14.476
5.989		16.03
11.533		37.618
7.731		13.466
7.186		18.02
9.817		31.551
7.437		9.265
7.749		19.415
13.476		12.761
6.935		18.137
11.807		14.754
15.944		24.827
8.555		16.89
11.888		11.049
9.711		23.851
11.246		28.567
8.191		15.833
8.252		12.054
15.739		19.686
20.921		15.605
11.388		19.858
15.694		23.508
9.039		16.402
14.096		20.288
13.628		25.041
18.418		24.207
13.265		12.895
12.113		23.603
16.19		12.617
25.454		12.742
19.469		15.958
7.062		16.101
16.105		17.081
5.598		15.361
15.644
12.972
9.701
11.292
21.804
9.583
5.369
13.518
16.814
6.137
12.6
9.648
17.365
8.733
22.712
15.567
22.581
13.395
10.888
9.865
13.535
14.599
11.192
13.768
20.969
14.715
5.203
15.831
8.789
11.928
9.656
16.433
17.632
8.959
13.314
12.412
9.171
20.305
11.574
22.834
14.374
9.821
9.38
22.185
13.282
22.035
8.426
15.368
11.702
27.476
8.107
5.613
17.738
9.703
12.646
13.411
12.75
9.832
14.297
9.311
8.535
11.385
9.831
12.744
15.316
18.71
11.355
8.522
16.679
12.747
19.11
11.315
12.983
11.425
11.466
12.131
15.13
8.573
14.687
13.603
13.439
14.54
8.857
7.807
12.879
7.117
13.39
8.325
9.092
13.264
7.977
13.847
7.395
16.358
19.599
16.693
10.671
17.47
16.681
22.265
10.644
7.472
10.697
12.443
24.276
10.628
9.038
9.833
10.912
13.205
16.342
11.515
6.684
9.314
9.914
5.785
11.895
15.453
16.438
10.1
12.718
9.662
11.701
14.06
11.097
23.647
7.516
10.386
15.026
10.422
8.867
7.67
18.95
31.043
9.401
9.475
18.623
6.607
10.817
11.005
8.994
15.302
10.947
21.571
13.918
16.187
18.35
8.315
10.031
10.75
13.398
11.654
14.92
18.218
14.925
7.595
8.023
11.265
7.787
10.963
9.951
9.023
11.308
19.608
20.783
13.247
10.79
15.85
10.42
13.97
20.125
8.225
7.042
10.105
9.744
20.641
16.154
14.577
10.469
12.775
14.936
16.353
9.513
12.633
13.284
11.506
10.737
12.361
25.941
6.358
10.375
10.651
12.337
11.915
11.876
13.994
17.057
16.998
16.443
9.095
10.021
15.774
9.402
16.974
11.795
10.534
7.92
12.47
19.926
11.602
12.922
15.988
15.481
15.497
15.568
14.763
14.598
11.485
10.05
11.882
13.591
10.834
9.165
19.178
19.4
12.269
9.437
12.732
12.147
15.055
12.751
9.835
10.165
10.836
18.854
16.352
16.901
15.162
13.17
9.95
11.244
9.443
17.966
12.777
20.726
9.391
7.082
14.977
14.194
9.003
10.196
17.153
14.601
14.551
9.142
7.699
16.679
18.149
10.157
15.094
7.27
15.265
11.538
18.661
11.635
9.132
9.494
9.668
11.324
13.195
23.307
12.987
12.733
9.165
13.65
9.586
6.766
13.103
13.422
24.169
15.774
15.381
11.815
14.427
14.972
12.567
13.114
16.755
7.216
19.834
18.207
8.686
12.05
9.419
7.764
12.078
16.204
18.123
17.811
14.88
14.22
12.325
9.479
9.231
23.5
9.389
19.551
15.634
8.336
11.667
13.929
17.916
9.568
8.042
6.562
12.9
10.42
21.918
9.554
13.344
15.951
12.211
20.564
16.008
13.244
14.85
13.514
21.204
15.569
11.335
20.798
12.188
8.523
8.198
12.443
16.463
22.718
11.672
15.571
13.052
15.058
13.095
16.234
14.935
8.307
9.591
18.569
15.363
10.083
12.4
8.956
17.848
11.726
8.866
9.052
14.102
13.281
8.724
7.89
10.032
10.423
18.713
9.029
17.641
13.958
12.04
17.172
10.35
10.882
13.343
14.539
9.778
11.295
9.848
21.68
18.589
12.351
8.415
16.214
10.354
7.089
6.251
10.279
15.941
7.531
20.489
8.343
11.754
12.811
9.015
7.982
14.746
14.483
9.089
12.7
10.639
7.445
11.43
8.285
12.959
9.122
10.613
7.451
10.21
17.436
12.779
11.197
21.068
21.962
9.955
9.652
12.633
10.443
18.782
7.646
21.545
15.632
8.187
9.474
7.864
8.25
7.264
11.399
7.872
9.338
13.535
12.667
11.297
10.267
8.613
10.514
9.159
6.267
8.641
20.382
25.285
6.271
17.928
13.476
10.717
15.065
14.145
22.202
9.039
10.791
17.766
10.014
9.109
9.826
15.84
8.926
10.306
13.601
10.852
11.547
14.743
10.593
15.158
9.062
8.848
14.814
10.079
7.492
10.572
14.295
18.924
14.274
11.995
8.65
11.4
7.904
11.511
7.421
10.481
17.106
13.917
11.523
9.336
18.074
19.293
9.292
12.104
10.619
13.793
9.658
8.334
13.157
7.385
12.414
13.564
19.657
17.575
9.285
7.756
10.743
13.632
16.803
11.315
7.701
8.626
7.23
8.276
11.259
15.228
9.77
9.995
21.863
9.278
7.987
10.44
11.111
15.097
14.972
17.054
14.605
9.522
23.032
9.683
10.044
14.817
16.75
8.916
15.987
10.034
11.443
8.827
8.411
9.119
10.607
13.142
10.287
9.91
5.858
12.264
7.404
9.942
22.886
8.237
22.516
11.001
10.635
7.475
16.008
15.127
29.319
6.78
15.801
11.681
12.026
14.222
13.396
9.672
17.058
9.672
6.838
15.355
9.352
8.706
15.45
22.613
9.318
12.878
9.328
9.799
13.866
9.655
7.438
9.782
10.356
17.441
9.718
6.553
8.078
16.731
11.076
13.131
10.704
8.839
10.73
7.597
6.73
9.471
5.36
14.492
9.387
10.91
15.504
9.168
6.835
11.006
14.545
16.551
8.119
8.131
11.576
7.129
11.76
6.872
17.297
8.507
8.728
18.451
11.366
11.834
12.163
8.422
16.083
20.482
14.402
17.431
11.251
9.623
11.492
9.194
11.847
7.757
28.96
9.958
4.925
10.541
8.167
13.008
8.732
11.977
8.943
22.199
9.778
9.008
10.358
8.846
8.013
13.384
12.764
14.554
14.211
10.174
19.082
12.144
15.411
11.276
11.466
7.922
9.895
17.123
13.684
9.872
7.665
13.614
8.752
8.784
15.351
12.159
13.782
10.363
9.614
14.184
9.05
7.109
17.553
7.177
11.597
11.558
13.18
12.016
8.916
7.761
12.967
19.151
10.738
9.363
16.35
11.663
8.867
11.459
11.281
10.1
12.998
12.049
12.739
16.512
11.324
15.147
14.019
11.418
8.233
18.332
12.168
11.404
36.78
11.928
14.511
10.609
9.796
9.263
13.72
7.473
13.98
11.874
10.49
11.465
10.312
6.135
14.951
12.352
7.722
15.064
12.036
20.849
12.636
12.406
14.077
12.571
13.669
11.299
4.471
11.767
12.634
12.878
10.4
11.834
9.361
10.018
15.194
16.794
24.091
9.426
8.364
8.514
11.514
9.075
20.628
9.572
15.378
6.935
8.157
7.156
6.339
11.273
8.772
7.973
9.022
9.09
12.889
13.152
12.969
11.907
8.633
9.543
11.411
7.953
10.381
5.747
14.825
19.211
17.915
14.545
15.514
5.767
8.323
15.615
11.068
11.278
14.261
5.826
8.56
7.535
9.679
8.105
7.438
9.212
9.288
10.961
12.549
8.973
10.742
10.351
11.448
15.522
9.25
8.697
17.418
7.899
14.452
12.952
18.999
6.65
10.44
7.324
14.203
8.007
13.909
14.36
7.873
18.649
8.999
12.357
7.942
14.185
17.994
7.824
9.589
8.468
12.838
16.703
9.113
7.315
16.77
14.773
8.712
15.457
22.312
19.498
10.338
7.155
9.064
13.3
9.418
12.257
14.551
12.863
9.046
5.692
11.097
15.196
15.43
10.217
8.621
9.791
9.558
24.229
7.386
7.525
8.611
14.064
15.979
18.048
9.048
9.799
8.946
18.752
18.489
9.998
16.748
10.496
12.916
14.136
14.629
9.012
17.943
10.788
10.393
20.692
25.445
18.386
9.099
9.479
12.496
10.81
10.066
11.649
9.993
10.912
12.312
9.747
16.797
5.298
8.617
6.902
17.02
13.759
7.981
10.221
11.283
12.56
18.104
9.742
17.45
11.013
11.196
10.722
10.706
13.848
13.229
8.769
16.802
11.635
10.622
8.64
11.213
6.999
9.635
8.498
10.114
7.702
17.033
11.472
18.134
16.532
12.663
15.172
7.627
9.776
13.368
8.653
17.442
12.647
11.903
13.043
10.188
8.169
16.405
10.855
11.202
6.629
13.145
12.902
11.719
25.161
15.008
6.884
8.911
6.338
10.396
13.29
9.828
15.484
9.968
12.245
10.951
8.216
8.551
7.142
7.373
15.456
18.093
12.21
18.079
16.116
13.061
11.17
19.027
20.428
14.409
16.232
16.959
15.505
8.704
8.898
22.741
8.273
13.813
13.709
14.712
14.61
13.427
11.146
11.829
12.925
10.831
9.916
12.425
7.186
10.272
13.203
8.846
12.663
20.468
15.607
18.604
12.164
11.497
11.523
11.787
9.494
12.244
8.455
12.699
7.898
15.215
20.453
9.149
24.308
12.933
20.472
9.719
19.293
16.281
11.848
18.906
7.536
11.488
14.511
9.773
7.5
14.091
10.286
12.762
7.998
21.982
12.19
6.271
15.343
20.725
10.507
11.744
10.966
15.446
10.306
9.164
9.828
13.314
8.269
9.842
17.494
9.854
11.704
8.11
7.358
14.409
10.43
9.822
16.17
17.811
12.681
11.359
10.829
12.325
10.964
8.788
18.352
9.339
13.049
10.082
12.921
14.192
9.628
12.908
10.355
8.489
9.654
14.864
11.078
23.211
22.412
7.599
11.698
12.696
17.562
6.906
10.892
13.101
11.757
7.467
7.536
15.63
7.465
9.192
8.753
13.501
21.014
5.984
11.81
16.759
8.054
10.216
15.632
12.563
13.374
10.242
14.158
7.172
17.597
9.721
9.889
15.134
10.127
15.361
10.53
10.867
10.283
18.268
11.316
11.141
9.859
14.784
5.767
7.785
9.834
9.934
11.35
6.825
16.478
21.826
12.63
10.623
11.692
8.78
15.74
11.112
9.63
11.388
8.895
17.406
10.156
6.924
15.205
6.583
11.999
10.93
12.429
8.054
11.218
16.417
9.815
17.145
9.92
13.275
8.493
8.872
9.322
18.127
7.37
9.281
12.955
21.927
9.297
15.687
17.117
13.778
8.777
12.039
8.036
9.714
8.876
10.7
10.689
13.983
7.304
17.972
13.815
12.531
19.067
18.628
11.431
8.445
9.833
14.229
13.925
16.292
12.118
6.735
5.974
19.178
12.485
11.786
7.182
7.067
13.853
12.386
10.966
9.278
9.163
14.457
7.511
13.564
15.723
11.003
9.242
11.134
9.762
11.774
12.503
9.157
8.64
11.298
7.829
9.286
7.897
22.948
13.816
9.003
10.748
7.417
16.507
14.768
7.989
5.964
12.461
16.813
11.155
14.154
12.797
12.145
11.183
9.657
9.569
30.099
10.808
11.906
9.56
19.734
17.988
10.47
6.361

## Sheet: Figure 2k
TFP SR	TFP SR+2i	TFP N2B27 + F/A
5.619	7.494	10.09
7.886	5.442	6.259
6.339	5.876	11.027
7.375	6.596	7.022
6.2	4.881	11.325
5.929	8.012	9.17
8.211	7.27	10.485
6.56	6.328	10.942
6.018	5.915	10.248
5.733	5.876	7.062
5.031	6.396	12.997
6.451	6.437	9.506
6.801	6.606	7.51
6.916	6.074	9.772
5.549	5.18	9.456
6.124	8.811	8.798
4.736	5.742	12.607
6.643	4.254	7.756
5.395	6.238	10.122
7.773	5.765	10.818
4.43	5.77	9.395
4.954	5.363	9.008
7.338	6.483	9.181
7.063	5.192	10.354
6.286	5.192	8.866
8.135	4.538	14.387
4.993	6.837	8.429
6.128	5.837	12.549
5.285	8.099	9.799
12.596	4.408	9.036
4.872	5.861	12.167
5.262	6.062	7.196
5.135	6.059	12.34
7.004	4.862	12.561
5.19	5.759	15.341
5.089	8.757	8.824
7.153	8.484	6.218
4.763	6.797	10.788
6.565	6.765	8.398
3.995	6.191	5.731
5.498	6.573	7.542
9.667	5.995	8.436
6.372	7.217	8.434
7.794	6.335	8.711
9.513	7.841	10.378
5	6.82	8.209
5.163	7.582	5.993
5.431	6.631	6.408
5.669	6.191	7.867
6.808	8.42	9.114
7.072	8.066	8.969
5.765	5.672	11.491
5.591	5.097	8.498
5.625	6.65	7.86
5.496	7.727	8.723
5.214	6.076	7.388
6.632	5.149	8.595
7.897	8.583	7.854
4.12	6.969	10.642
5.905	4.864	8.563
4.402	5.071	8.797
4.689	6.329	8.55
4.775	4.788	9.303
4.538	7.24	9.575
5.522	4.675	15.446
6.042	6.47	8.128
8.089	4.933	8.966
4.486	4.422	8.046
4.171	7.873	9.433
5.297	4.727	9.16
6.875	6.257	8.672
5.08	4.735	8.948
3.897	5.293	6.471
6.344	5.311	7.512
7.435	4.58	6.792
6.612	4.953	6.827
4.153	4.325	8.472
6.537	6.384	7.375
6.316	4.469	7.172
6.199	7.206	8.758
5.22	3.845	10.779
6.362	7.935	7.02
4.727	3.676	8.185
5.871	4.31	7.036
6.71	4.239	8.302
6.052	5.738	5.697
7.117	5.47	10.292
4.854	3.985	10.116
6.181	8.649	8.908
7.314	5.981	6.532
7.08	4.937	6.724
7.183	4.954	7.868
6.479	5.455	9.828
7.065	6.785	11.043
5.015	5.967	10.901
4.445	5.431	8.896
6.867	2.685	8.487
5.019	5.193	7.845
6.825	4.331	9.204
7.123	7.258	7.741
6.289	6.182	8.873
5.741	4.788	8.361
5.016	6.729	7.515
7.624	11.629	7.448
5.718	6.465	9.923
5.77	8.153	7.052
8.75	6.189	10.037
6.099	3.44	9.124
5.101	9.174	6.521
6.839	7.575	10.677
6.841	5.618	12.645
4.516	5.072	11.619
5.822	9.352	9.184
5.328	5.8	6.516
5.489	6.815	6.746
7.204	5.533	9.981
5.929	4.043	13.96
6.555	4.603	9.616
5.287	4.45	9.759
8.676	5.873	6.954
4.553	8.019	6.974
5.077	7.348	8.843
8.166	4.492	10.161
9.768	3.877	13.343
5.337	5.723	8.567
6.257	4.047	10.706
4.371	4.337	6.566
7.232	6.258	5.945
6.329	6.624	17.469
5.768	5.206	7.519
7.994	8.384	8.266
5.766	4.742	10.372
10.31	4.327	13.156
5.14	6.299	7.21
8.064	7.036	13.023
7.83	4.769	11.796
6.187	4.603	11.015
8.175	4.63	8.031
10.706	5.776	8.699
4.839	4.734	10.847
8.975	5.701	8.258
6.978	4.893	8.227
5.809	6.185	9.907
7.949	4.875	7.043
7.926	5.094	9.039
7.126	6.606	15.373
5.034	7.094	9.093
7.169	7.358	9.316
5.901	6.023	9.344
7.946	7.355	6.808
5.102	5.656	8.107
5.663	4.389	7.978
7.749	5.212	8.086
8.087	5.767	9.195
6.285	6.356	8.564
7.544	4.875	6.33
6.418	5.39	9.427
8.358	5.938	8.635
7.729	6.022	11.137
4.162	6.049	7.12
6.75	5.427	8.544
7.678	5.444	10.495
4.893	5.464	9.549
4.944	5.29	10.282
9.252	5.562	9.501
6.449	5.656	7.157
4.784	6.282	7.312
5.32	4.488	7.803
7.634	4.725	9.668
6.751	5.6	10.548
5.789	3.949	12.18
9.211	5.327	8.629
4.56	6.436	15.485
8.017	5.388	10.017
10.331	6.984	7.633
10.973	4.795	11.629
7.785	5.743	9.427
5.255	4.792	8.803
7.224	5.047	10.792
8.795	4.449	9.088
5.019	6.729	10.085
4.624	10.756	8.958
6.296	5.552	11.683
7.232	5.822	13.468
5.63	5.724	10.814
7.432	4.494	6.033
8.512	3.966	8.663
6.903	5.499	8.28
5.66	4.987	8.71
10.738	6.355	7.554
9.059	4.546	7.385
4.824	5.335	8.864
6.882	6.038	10.079
7.008	5.73	8.298
8.663	6.906	7.629
6.459	4.053	13.043
6.099	7.008	8.088
7.422	7.008	9.058
5.238	7.112	8.627
7.889	5.957	7.776
9.607	6.119	8.644
6.17	7.841	6.626
4.544	8.377	7.343
6.62	6.198	9.065
6.756	6.194	9.111
6.416	6.526	9.334
5.59	5.745	10.612
8.714	6.507	10.874
7.966	5.071	8.014
3.772	5.027	11.811
6.625	4.916	9.628
7.435	5.809	8.844
6.345	4.27	7.602
7.945	5.535	7.543
5.2	7.697	8.201
6.99	5.694	7.268
6.553	4.874	10.089
6.38	5.282	10.484
7.325	6.876	13.642
8.415	5.533	9.03
7.649	5.174	11.132
4.508	6.127	8.613
6.763	6.298	11.351
6.101	6.672	7.691
6.968	5.388	12.433
8.35	9.198	16.928
7.161	8.683	10.237
4.536	6.736	10.54
6.082	6.562	9.58
4.741	6.302	7.838
5.84	4.772	9.359
8.169	5.233	6.759
6.452	7.426	9.158
8.293	6.468	7.902
6.932	7.459	9.069
7.575	5.915	6.413
4.828	4.876	12.133
9.004	6.269	12.847
6.011	5.24	9.371
6.003	8.037	9.921
5.618	5.739	11.779
4.858	4.752	6.835
5.928	5.013	10.137
8.421	5.48	11.107
6.397	6.067	9.161
8.214	8.399	9.166
8.446	4.182	10.889
6.997	6.147	10.048
7.367	5.774	10.044
8.751	8.606	8.065
8.225	6.424	8.322
5.429	6.482	9.994
6.332	4.928	7.457
5.723	5.234	7.763
8.846	4.967	8.659
6.389	4.909	9.18
8.505	5.296	7.851
7.946	5.024	9.493
4.865	5.31	7.45
4.81	5.642	10.937
8.942	6.997	8.886
5.965	6.325	7.458
4.95	5.555	8.842
8.636	6.894	7.52
6.708	5.779	13.073
7.256	5.433	8.618
6.278	4.688	9.498
5.324	4.779	7.678
5.764	6.123	9.029
6.918	7.212	8.378
11.34	6.552	9.311
6.047	4.975	7.554
7.669	5.21	9.34
7.35		9.05
8.344		7.443
4.463		6.495
5.869		5.931
4.781		6.767
9.509		8.499
14.711		6.932
7.171		7.96
7.157		5.662
7.824		7.891
7.082		7.009
11.253		6.27
9.105		6.545
5.401		8.585
5.507		12.1
5.811		5.202
5.742		8.324
12.708		6.263
11.275		8.648
8.262		6.816
6.901		9.78
6.034		9.504
7.57		8.371
6.532		13.126
7.901		8.925
4.67		5.858
4.96		9.236
11.223		9.062
8.956		10.906
6.25		9.278
7.073		9.526
6.039		11.105
5.443		8.135
4.725		6.904
5.124		16.197
5.104		8.427
5.809		8.787
6.125		13.772
5.003		6.123
5.344		12.202
6.365		7.279
5.274		6.937
6.874		6.614
7.293		10.413
4.846		9.489
6.697		5.509
5.664		11.323
6.942		15.033
5.6		8.041
6.412		5.519
8.475		10.121
11.337		9.101
6.2		12.071
9.15		11.31
6.24		9.828
7.287		7.202
9.112		11.918
8.611		9.267
7.252		7.806
8.54		9.781
8.16		7.518
12.945		7.603
9.666		8.76
5.401		9.839
7.538		8.954
5.169		12.825
6.622
5.704
5.593
6.869
9.016
5.749
4.811
7.739
7.489
4.613
6.577
5.633
9.489
5.424
11.371
8.297
9.106
4.633
6.427
7.052
7.915
6.057
5.913
6.089
7.865
5.221
4.461
7.804
5.936
9.061
6.597
7.545
9.369
5.723
7.066
4.571
5.636
9.937
7.091
10.745
8.134
6.013
5.381
11.611
7.399
10.481
6.345
6.795
7.662
14.656
7.515
4.457
8.078
6.594
5.473
8.624
7.094
5.843
7.841
6.031
5.357
4.949
9.741
7.404
7.83
9.55
6.853
5.759
7.954
6.832
11.738
6.885
7.737
6.661
7.841
6.223
8.314
6.036
6.132
6.28
6.911
7.693
7.216
5.068
8.654
4.5
6.643
5.7
7.921
7.256
5.421
7.724
6.218
7.878
10.747
7.572
9.868
8.454
9.211
9.617
7.005
6.065
7.168
8.273
9.923
5.202
6.844
6.531
7.222
8.489
8.021
6.88
5.797
7.237
6.249
4.968
5.65
7.744
9.255
5.22
8.614
7.015
6.895
10.382
8.158
9.226
5.374
7.382
9.082
5.529
7.759
5.093
9.757
15.33
5.783
6.662
9.422
4.852
4.873
6.893
6.001
8.179
5.864
10.241
7.462
7.674
8.814
5.676
6.704
7.999
6.849
7.143
8.405
9.203
7.883
5.052
7.608
5.694
6.094
5.568
6.31
6.494
7.454
10.059
8.868
6.721
6.826
8.847
6.984
8.961
11.443
5.479
5.594
6.966
6.346
8.545
6.99
6.92
6.699
7.041
7.315
9.161
6.317
8.086
9.679
9.985
6.189
8.738
10.265
4.851
6.571
6.058
7.102
7.051
5.826
8.505
8.366
14.678
13.045
6.073
7.768
7.543
6.604
7.462
6.952
6.417
5.259
5.273
8.905
6.784
6.493
8.106
9.731
8.342
8.413
9.139
6.419
6.356
6.496
7.197
4.963
6.87
6.05
9.762
10.903
6.903
5.603
7.457
7.502
7.534
6.545
5.482
4.411
6.67
9.23
10.108
8.14
9.36
7.73
5.546
7.7
6.224
10.378
6.59
10.568
5.532
5.232
10.992
9.753
5.652
6.701
10.847
7.608
4.583
6.579
7.213
7.55
7.988
8.453
7.988
5.343
9.177
6.865
9.912
6.269
5.675
5.662
5.674
6.976
6.984
9.778
6.827
7.958
7.11
5.401
5.892
5.448
7.287
7.939
8.869
6.638
8.022
7.828
10.088
11.632
7.463
11.17
8.423
6.995
6.739
10.978
7.184
6.844
5.989
6.45
5.501
8.427
10.518
9.833
10.168
9.299
6.789
6.064
6.758
13.749
6.248
7.03
5.975
5.748
7.849
9.393
8.307
6.115
5.331
4.071
8.142
4.808
10.994
6.549
6.955
8.158
6.628
10.817
8.499
7.172
7.136
6.982
11.338
7.952
7.52
8.456
6.897
4.982
4.937
8.509
8.57
8.129
6.44
8.166
5.198
7.793
6.72
8.577
6.013
5.769
6.81
8.728
9.323
6.595
8.289
5.485
8.666
7.564
6.037
6.212
7.724
7.153
5.452
5.224
7.939
6.763
10.704
6.146
7.228
10.605
6.856
9.235
7.594
6.77
6.106
7.201
6.347
6.216
5.693
12.501
8.943
7.003
5.738
9.344
5.445
4.397
4.468
6.377
8.027
5.14
7.723
5.375
7.553
6.531
5.451
5.027
7.672
9.011
6.808
7.417
6.165
5.397
5.87
5.094
7.057
6.232
6.638
5.074
4.668
8.076
9.286
6.099
14.262
10.777
5.863
6.222
5.702
5.685
8.928
6.084
8.333
7.614
5.703
5.278
5.267
5.356
6.517
7.07
6.044
5.474
8.733
6.814
6.106
6.984
5.077
6.402
5.565
5.446
5.442
10.671
7.812
4.607
9.83
8.45
5.947
7.534
7.545
8.908
5.511
6.179
7.432
6.285
5.005
6.777
7.709
5.133
6.854
7.117
7.992
5.561
5.853
6.634
8.559
5.187
6.398
7.749
6.111
6.209
5.76
7.951
5.029
9.238
8.525
5.181
7.055
5.997
6.917
5.278
6.203
9.889
7.363
6.277
6.27
8.392
10.006
6.819
7.433
6.174
8.149
5.46
5.526
5.671
5.423
7.562
10.74
9.598
7.998
5.086
4.821
5.848
8.13
9.623
6.204
5.528
5.24
5.765
5.223
7.516
8.654
5.344
5.259
11.046
5.192
5.844
6.559
5.857
9.012
7.821
6.715
5.194
5.288
10.03
5.662
6.196
9.244
8.759
7.19
9.113
6.815
7.453
5.246
5.731
5.252
8.122
7.254
7.095
7.09
4.929
6.111
5.05
6.193
11.612
5.882
10.226
6.845
6.078
6.02
7.609
6.485
12.883
4.296
9.491
7.767
7.312
7.373
6.417
5.344
7.515
6.484
5.797
9.035
4.965
5.059
6.701
11.858
6.371
7.269
5.249
5.617
6.756
6.098
4.876
5.952
6.809
10.108
6.789
5.383
5.473
8.12
6.026
6.634
5.824
5.2
7.141
5.284
4.445
5.181
4.912
8.037
5.584
5.966
6.23
5.913
5.086
6.614
7.932
7.149
5.927
4.628
7.153
5.513
5.913
4.659
7.424
6.026
5.327
8.081
6.273
7.05
7.984
5.79
6.458
10.413
7.736
9.085
7.506
5.869
7.22
5.36
5.386
5.295
11.639
7.751
4.063
7.194
4.849
7.983
5.591
6.846
5.933
9.197
6.015
4.461
5.042
5.451
5.985
6.998
7.908
9.414
12.231
6.063
10.311
5.054
6.587
6.305
7.593
5.042
6.93
8.075
6.169
6.059
5.329
6.227
5.222
5.579
6.434
5.833
6.584
6.493
5.785
7.569
5.916
5.148
8.417
5.005
6.74
5.966
6.462
7.301
5.435
6.726
9.083
8.786
5.961
6.684
9.498
6.602
6.108
8.936
6.661
6.961
7.77
6.364
5.871
7.865
6.759
7.292
11.964
8.245
6.003
6.821
7.108
6.653
13.839
8.013
7.324
6.153
5.439
7.075
6.152
4.98
5.688
6.593
7.178
5.024
5.85
5.23
6.997
8.09
6.239
8.6
7.172
11.504
6.648
4.835
7.959
6.306
5.57
6.798
4.19
7.001
10.151
10.546
4.535
7.473
4.98
6.05
10.001
8.315
10.102
7.252
6.378
6.346
6.395
5.715
9.249
5.939
7.531
4.389
4.684
5.583
5.72
8.65
5.167
5.579
5.914
5.485
7.632
6.966
6.332
6.82
5.888
6.803
7.567
6.964
6.146
5.043
9.741
9.83
10.083
8.134
7.657
4.297
6.154
11.091
6.138
5.586
7.882
4.685
5.135
6.431
5.496
5.768
5.497
6.267
6.119
6.298
9.078
5.002
5.598
6.183
6.343
11.09
6.379
5.957
11.163
5.426
7.613
9.196
10.41
5.18
8.715
4.883
6.692
6.038
6.1
8.56
5.195
9.137
5.464
6.016
5.531
6.205
8.516
5.3
6.844
6.528
4.739
7.64
5.815
5.39
7.991
7.589
5.257
6.992
9.368
8.013
6.493
5.869
6.366
6.724
7.091
7.153
8.318
6.848
6.048
4.785
6.524
8.032
7.963
7.073
5.421
5.767
6.346
11.75
6.252
5.406
6.188
10.516
8.054
9.138
5.715
6.276
6.807
8.361
7.633
5.556
8.007
4.992
8.67
8.344
7.558
5.771
7.697
7.299
7.15
9.701
8.152
7.752
5.164
7.236
8.012
8.051
6.409
6.888
6.077
6.831
6.525
6.212
10.797
4.271
6.13
4.991
7.485
7.29
6.37
5.787
6.319
8.104
9.777
5.671
9.333
6.512
7.698
6.556
6.876
7.243
8.47
6.994
7.163
6.129
6.58
6.422
7.472
6.477
6.07
5.434
5.724
5.122
9.487
6.954
9.456
7.936
8.216
8.255
5.815
6.98
6.874
7.769
7.23
6.755
6.819
7.752
6.387
5.724
8.063
6.901
6.619
5.429
6.756
7.498
7.094
12.3
8.525
5.488
5.433
4.785
6.803
9.011
6.545
5.44
6.266
8.26
9.638
5.895
6.071
5.343
5.568
7.581
9.868
5.511
8.135
7.823
8.278
7.435
8.003
8.635
8.932
9.688
6.922
7.646
7.735
5.963
12.592
5.951
7.759
5.227
7.752
9.963
7.465
6.865
6.339
8.085
6.839
6.56
6.394
5.638
5.967
7.929
6.264
7.989
9.048
6.022
9.355
9.459
5.626
5.935
7.786
7.105
6.886
6.137
5.172
6.383
6.574
6.54
6.989
13.423
7.353
8.825
5.765
8.506
7.799
7.289
8.654
4.557
5.521
7.548
6.881
4.552
7.294
7.033
6.592
4.893
9.331
8.043
4.522
8.109
9.449
5.864
7.888
7.077
7.304
6.461
5.733
6.66
7.688
6.573
8.387
10.378
5.953
8.655
5.29
5.379
9.068
6.911
6.263
7.555
7.628
7.437
6.196
4.902
7.665
6.021
6.138
8.771
5.947
5.881
5.671
6.805
6.933
6.973
8.035
6.512
5.759
7.036
9.39
6.05
8.313
10.444
6.704
6.543
7.409
9.357
6.992
6.982
7.539
6.146
6.832
4.785
7.575
6.19
7.753
5.582
6.668
9.249
5.032
7.828
6.573
7.167
6.366
7.535
8.324
7.41
5.723
8.519
5.667
7.317
6.408
5.272
9.539
6.087
7.364
6.074
6.078
6.804
9.232
8.498
6.508
5.746
8.058
5.78
6.159
5.948
6.681
7.416
5.709
8.123
10.08
7.583
6.911
6.028
6.185
6.92
6.94
7.161
7.47
5.709
7.14
6.147
5.331
7.657
4.614
6.231
6.576
7.133
6.179
7.449
7.57
5.888
8.671
7.6
8.906
5.128
5.297
7.983
8.349
4.476
6.434
5.991
10.68
5.638
9.282
9.463
7.362
5.823
6.684
5.64
6.553
5.807
6.301
6.51
5.526
5.554
7.97
5.684
7.952
9.738
10.738
8.838
6.023
4.832
7.377
10.859
7.38
6.842
5.625
4.842
8.536
6.901
7.243
5.095
5.134
7.563
8.092
6.922
5.291
6.754
6.954
6.26
8.765
7.437
6.801
6.712
6.269
6.136
6.002
6.367
6.375
6.572
5.449
5.954
5.732
6.405
8.074
8.378
6.115
7.583
5.686
8.763
7.291
4.997
5.15
6.025
9.469
7.106
6.862
6.787
5.615
6.926
5.197
6.291
8.545
7.563
7.773
6.122
9.2
8.329
5.73
4.572

## Sheet: Figure 3g
ctrl			KO A			KO B			KO C			KO D			wt
2.55	2.596	2.78	2.28	2.25	1.69	3.4	3.71	3.65	1.14	1.45	1.57	2.15	3.02	3.95	1.2	0.89	0.94
2.42	2.687	2.78	2.44	2.34	1.71	3.21	3.26	4.07	1.17	1.44	1.56	2.31	3.08	2.91	1.07	0.88	1.03

## Sheet: Figure 3g´
GFP	KO A	KO B	KO C	KO D	wt
4.09	5.65	8.74	5.47	6.78	0.84
6.57	2.21	7.1	5.28	8.48	0.86
3.92	2.51	6.5	5.81	10.23	1.29
7.34
7.05

## Sheet: Figure 3g´´
ctrl			KO A			KO B			KO C			KO D			wt
1.84	1.83	1.9	2.34	2.98	1.89	2.11	2.88	2.98	1.09	1.16	1.15	1.89	1.69	2.2	1.08	0.82	1.05
1.83	2.15	1.84	2.16	2.67	1.63	2.39	2.29	2.63	1.14	1.14	1.19	1.83	1.73	1.99	1.11	0.82	1.12

## Sheet: Figure 3h
GFP-MYC			GFP-MYC; Sub-cluster C deletion
SR+LIF	SR+LIF+2i	F/A	SR+LIF	SR+LIF+2i	F/A
6.08	5.611	9.089	2.387	3.867	1.154
11.33	3.459	8.822	3.384	7.87	1.974
6.593	8.337	19.796	2.209	10.388	1.412
6.469	6.728	14.957	7.245	5.036	1.1
4.596	7.475	21.548	5.805	5.077	1.519
3.925	4.589	8.846	5.302	14.697	1.844
4.822	8.869	16.569	5.015	3.724	2.968
5.907	7.793	9.324	6.295	8.414	1.909
9.696	10.732	19.151	4.409	6.689	1.491
16.446	9.849	16.325	4.074	5.684	2.156
17.506	17.089	20.154	3.377	5.322	1.777
11.008	2.182	26.634	6.019	4.26	1.968
10.984	14.358	13.161	3.979	4.87	1.489
8.658	11.17	15.628	4.531	5.973	4.08
2.417	8.101	13.882	3.162	6.129	1.366
4.827	4.805	24.322	2.847	4.148	2.374
5.435	10.626	9.977	3.528	4.163	2.554
5.476	16.889	10.113	2.285	4.769	2.089
16.573	15.601	10.541	6.418	7.324	1.419
3.214	8.024	16.53	6.308	6.041	2.834
20.981	12.513	10.788	2.425	4.765	2.267
5.313	11.313	16.808	5.5	5.062	2.227
23.085	10.614	9.774	6.712	7.15	2.58
5.593	10.591	11.548	7.835	9.298	1.305
26.225	8.348	13.399	5.092	5.163	2.35
29.507	17.133	11.279	5.736	4.053	3.311
12.39	10.724	12.035	8.864	6.439	1.27
5.973	7.472	17.244	6.004	4.92	1.377
11.557	15.888	11.042	2.569	3.914	1.751
24.644	7.958	20.588	3.173	6.169	1.897
10.393	11.601	28.544	11.299	5.344	2.656
11.774	18.179	15.951	3.33	5.534	2.674
12.438	12.92	18.101	4.397	6.426	1.822
4.724	10.337	14.178	17.121	4.742	3.081
10.462	18.917	11.814	5.205	7.204	1.802
5.546	10.126	30.788	4.534	8.191	2.492
1.972	14.042	19.058	7.328	8.208	1.314
18.506	17.109	16.096	3.973	4.95	2.103
11.27	9.256	18.115	3.976	5.585	1.71
4.76	8.094	14.265	4.056	9.849	2.022
18.939	9.361	9.494	4.035	3.909	1.439
3.119	5.625	11.473	2.683	13.034	2.532
3.852	5.515	26.331	3.694	8.227	1.848
1.951	12.72	11.257	4.906	5.932	1.784
5.106	9.985	12.361	3.918	7.674	1.625
4.996	11.994	14.597	3.949	4.52	1.913
5.616	6.084	29.144	3.651	8.819	1.598
3.184	6.839	18.138	6.891	10.243	2.281
25.078	6.327	25.567	2.59	6.18	1.859
6.625	2.971	21.353	5.015	5.145	1.825
18.338	4.141	23.588	2.362	5.264	1.777
4.593	9.941	22.87	10.403	4.256	2.152
5.667	6.534	14.627	2.704	5.883	2.332
5.528	4.41	16.706	8.751	12.561	1.14
4.399	4.664	21.985	23.058	3.897	1.415
6.689	10.25	29.994	6.133	7.45	1.6
8.282	10.924	19.961	2.978	4.03	2.123
6.595	11.796	20.326	4.583	7.235	2.06
8.434	12.057	9.516	4.532	8.162	1.704
4.124	9.986	16.189	6.473	9.064	1.764
10.677	9.345	14.793	3.15	7.194	2.539
2.005	12.752	17.629	6.748	5.768	1.591
11.375	8.653	8.58	4.329	4.768	1.477
13.869	6.311	20.191	5.894	4.998	1.345
14.371	12.918	28.006	4.693	12.278	1.713
21.388	20.159	21.844	3.348	5.372	2.975
4.022	10.211	24.866	3.785	4.353	2.478
9.016	5.432	21.25	4.267	5.688	1.519
6.505	1.667	12.853	4.183	9.209	1.908
11.428	7.063	20.622	4.339	4.118	1.658
14.654	14.681	29.031	5.219	8.684	1.971
3.965	6.732	18.105	4.112	8.837	1.476
1.992	6.627	18.058	5.428	7.292	1.637
6.378	7.261	21.791	3.29	3.524	1.327
16.635	8.158	10.773	5.614	5.039	2.512
4.661	8.954	13.658	4.05	8.26	1.513
10.711	15.815	17.067	6.921	8.305	1.266
2.668	8.279	23.732	2.669	5.597	1.674
17.994	10.169	19.154	7.171	7.907	4.234
5.454	15.342	19.559	2.907	6.316	1.114
7.854	7.383	14.467	5.017	5.675	2.323
11.059	6.124	20.197	3.858	4.542	1.73
3.012	13.685	20.177	4.096	4.968	2.977
6.674	3.996	11.7	4.701	5.471	1.255
6.805	5.405	12.663	4.263	4.07	1.189
11.089	12.479	3.876	4.603	8.109	1.47
6.265	11.878	15.712	5.016	5.023	1.447
11.463	7.843	21.518	9.712	8.799	2.949
20.236	3.622	16.684	8.204	4.244	1.98
3.704	7.945	15.822	2.967	5.054	1.385
5.622	9.489	10.817	2.54	9.166	1.377
18.762	10.95	16.366	4.69	5.631	1.342
9.148	9.21	26.358	5.624	11.043	1.672
18.728	3.385	10.605	2.207	5.618	1.758
3.668	7.422	7.72	4.235	5.889	4.661
15.387	10.552	12.98	2.739	5.22	2.55
7.651	3.777	8.645	4.361	4.751	2.002
1.916	5.173	12.597	4.896	7.772	1.993
10.345	4.806	18.349	5.35	6.409	1.95
2.803	9.478	20.572	6.768	4.794	1.676
16.486	6.315	15.683	10.427	8.221	1.727
7.359	16.657	15.612	2.923	4.488	1.428
20.29	6.413	15.907	5.537	8.307	1.486
18.473	4.384	21.613	6.062	10.425	1.53
7.365	7.363	24.183	2.305	5.799	1.629
14.348	6.779	26.759	2.471	5.504	2.373
6.648	9.248	6.582	3.564	5.995	1.323
14.636	4.54	16.88	2.434	10.197	2.213
7.418	6.006	35.979	3.135	9.679	2.415
8.363	5.426	23.376	4.708	7.098	1.66
2.995	7.157	15.178	8.479	5.54	2.377
2.327	7.383	10.167	3.965	6.677	1.453
4.134	7.592	14.246	5.235	5.411	2.156
5.084	4.506	14.171	5.27	3.745	1.337
5.798	10.588	17.195	5.813	8.538	1.453
11.825	5.723	18.756	3.73	6.76	1.87
4.177	11.029	19.031	7.147	5.444	2.013
5.444	7.989	20.66	3.232	3.85	1.763
7.488	6.365	13.194	4.107	7.276	2.461
10.909	6.564	31.907	6.045	6.225	1.701
5.959	6.408	15.27	5.871	5.488	1.762
3.643	7.818	19.524	4.511	7.882	2.774
4.209	7.04	19.665	3.463	7.466	1.468
5.571	4.228	9.345	3.352	5.284	1.699
19.997	6.354	21.727	4.227	4.481	2.097
19.485	7.306	17.606	2.656	9.364	2.37
15.433	10.806	21.681	2.643	7.457	1.654
2.393	8.424	25.501	4.024	5.744	1.553
4.517	8.121	17.511	3.849	7.198	1.503
2.332	5.264	31.195	4.892	4.355	1.505
6.762	3.282	19.305	4.793	6.769	3.095
7.57	4.811	27.543	7.064	4.116	2.811
7.001	7.381	17.199	7.951	4.38	1.869
5.96	5.089	20.313	25.487	5.444	1.723
17.183	8.858	10.716	4.869	7.912	2.698
9.223	8.146	18.925	14.472	6.471	2.355
17.914	5.215	15.726	5.121	8.023	1.696
8.021	6.744	22.003	16.86	7.174	1.967
20.737	11.464	20.065	9.061	6.541	1.44
7.313	4.646	8.509	6.094	3.748	3.33
10.149	5.513	9.722	4.012	9.395	1.942
8.283	6.302	17.136	5.675	5.77	2.15
3.984	8.21	16.497	7.71	7.042	3.317
17.075	8.256	9.699	7.288	5.127	2.64
3.71	6.224	20.403	6.444	6.896	2.023
32.557	9.389	15.369	4.024	5.93	1.555
3.196	5.405	25.663	4.121	11.336	1.242
6.864	5.28	13.055	6.311	5.395	3.66
6.567	5.584	24.662	6.196	4.407	1.954
11.362	7.429	5.028	8.141	6.616	2.935
8.565	3.926	15.395	3.816	7.647	2.735
27.788	4.517	11.796	15.239	8.216	1.958
2.721	9.797	6.824	3.822	4.018	1.567
8.046	5.955	8.29	4.028	5.54	2.527
8.655	11.46	19.327	6.78	4.504	1.754
9.815	9.339	18.817	2.353	5.597	2.122
2.363	9.65	8.831	7.194	8.33	2.225
5.476	8.8	19.933	4.196	6.157	1.29
22.919	8.009	23.388	6.572	3.808	1.346
6.817	5.637	14.958	3.493	5.305	1.595
3.585	9.73	12.582	4.861	3.493	1.532
7.21	8.798	16.483	3.738	5.017	2.166
8.718	16.358	15.856	6.671	8.997	2.611
5.137	5.34	21.748	3.557	6.485	2.518
6.185	5.369	7.774	3.806	3.724	1.706
6.602	5.973	26.824	3.847	5.156	1.462
5.775	3.775	18.238	3.394	10.768	1.805
1.758	6.349	27.32	2.331	5.692	6.816
12.605	6.688	15.342	21.851	7.619	1.637
6.207	7.031	8.252	5.236	6.112	3.293
3.405	6.232	20.809	11.158	6.243	3.882
9.244	5.941	17.975	5.46	4.272	2.695
2.243	2.358	19.666	4.816	5.509	1.26
5.88	6.683	29.05	7.066	8.153	1.584
4.022	4.572	15.793	7.484	7.298	1.921
9.258	5.034	17.653	3.213	7.174	2.289
7.6	4.006	9.042	7.432	6.847	3.914
4.565	13.619	20.429	4.22	6.758	2.91
10.529	6.464	8.161	4.505	8.637	1.869
8.854	9.6	9.591	7.41	9.341	1.147
8.78	7.522	16.22	3.337	9.191	1.597
6.408	7.347	14.183	4.508	7.579	2.294
12.675	2.321	20.567	3.625	6.138	1.647
4.753	5.146	7.496	6.676	3.791	2.138
19.907	10.535	28.764	4.91	6.296	2.302
17.29	3.161	25.274	4.322	4.344	2.302
7.826	6.565	22.109	4.905	8.321	1.676
10.946	5.203	21.068	5.779	6.661	1.767
3.398	6.626	19.531	3.198	4.582	0.985
18.913	3.332	15.111	5.127	9.675	1.413
9.819	8.376	19.707	10.991	4.185	1.617
9.487	6.166	21.305	4.234	6.458	1.778
11.363	5.781	19.375	8.008	5.002	1.676
6.696	9.918	18.697	5.24	9.666	2.974
5.702	4.277	11.409	3.408	4.598	2.026
10.383	5.274	21.124	5.559	4.49	1.594
6.14	5.25	16.861	9.666	7.593	1.724
5.162	6.827	23.675	4.629	5.906	1.917
5.115	4.056	9.205	5.805	7.155	2.017
6.499	6.577	13.68	4.38	6.983	2.106
8.255	8.303	21.177	7.919	4.511	2.027
16.419	4.363	11.48	4.597	6.304	1.992
13.686	7.554	18.298	5.262	10.832	1.914
18.852	10.432	5.555	7.678	5.399	3.777
6.778	3.718	14.481	8.846	4.398	3.218
13.677	5.713	20.749	5.461	6.695	1.7
8.092	8.229	17.647	3.463	5.947	1.68
6.551	5.362	24.825	5.934	4.777	2.147
4.845	4.284	15.776	14.059	8.057	1.588
9.071	3.364	13.945	5.759	5.366	3.927
8.524	8.958	19.831	6.303	8.963	2.342
5.677	6.206	12.663	7.398	5.264	2.382
5.306	7.145	5.009	7.78	6.264	3.009
8.491	3.523	47.044	4.98	6.162	1.593
9.168	3.992	8.527	7.566	7.136	1.652
20.023	8.405	16.147	5.046	3.998	2.039
18.699	5.629	23.197	5.265	5.612	5.011
22.122	5.097	19.272	6.428	5.467	1.619
4.98	5.359	16.74	3.446	5.601	3.287
20.495	8.382	12.039	6.379	6.338	2.068
10.366	4.998	14.117	8.711	6.769	1.671
13.505	3.4	13.98	6.852	5.339	1.696
5.626	8.981	4.6	5.152	9.521	2.379
6.733	8.648	15.072	3.606	3.614	1.363
2.996	8.153	10.51	5.583	5.003	4.804
10.082	3.591	22.683	3.977	5.881	1.428
3.617	13.648	6.084	3.342	6.611	1.667
4.127	7.986	9.085	8.604	3.793	2.331
10.367	6.248	24.343	3.451	4.783	1.658
23.784	9.719	14.233	4.502	5.269	1.857
19.287	14.215	6.92	6.971	7.911	2.38
6.867	5.356	13.028	7.04	4.631	1.588
10.218	3.686	15.973	6.336	8.038	1.379
15.452	6.511	6.591	5.829	5.226	2.155
8.754	4.927	17.966	5.267	4.675	3.262
10.627	4.1	12.179	3.406	8.046	4.141
8.364	6.011	16.58	2.798	4.851	1.778
4.917	4.448	5.758	4.701	10.968	1.739
5.879	3.064	18.814	3.925	5.546	1.517
3.914	5.444	7.747	3.216	7.286	1.783
4.524	11.684	27.284	2.842	5.477	1.592
15.102	10.457	4.455	5.095	5.851	2.169
15.898	3.839	27.539	5.047	9.138	1.805
9.026	6.777	18.379	3.494	5.557	2.897
6.618	3.155	14.304	3.029	6.363	2.472
2.036	5.79	10.792	6.089	6.994	1.57
15.688	7.152	3.212	3.621	6.557	2.569
9.634	10.293	11.019	3.764	10.188	2.842
5.899	3.529	6.841	16.647	4.105	1.403
34.708	3.477	21.251	6.904	8.447	2.185
5.328	7.825	9.711	6.864	5.022	3.155
16.574	6.933	9.406	7.128	4.958	1.646
6.26	3.045	12.547	14.493	4.731	1.935
4.065	3.835	13.026	9.288	7.151	2.862
1.862	3.533	11.321	6.324	6.674	1.589
8.642	5.024	4.091	3.729	7.12	1.58
4.913	3.366	13.843	3.053	5.647	1.62
4.595	8.049	4.973	4.504	4.604	3.861
18.488	5.192	5.886	4.012	3.893	2.103
12.918	5.635	22.277	5.489	9.993	3.541
10.843	3.939	3.496	3.763	8.011	1.687
7.128	5.36	11.587	12.132	3.393	1.376
6.075	4.817	3.804	8.207	10.105	2.069
10.872	2.518	34.041	3.069	6.726	1.907
13.728	5.503	15.834	6.181	5.223	2.517
8.635	12.13	5.229	5.017	4.692	1.784
26.861	5.913	19.43	8.599	6.765	1.621
18.895	2.817	15.084	8.598	4.052	2.236
9.88	7.742	17.944	6.52	6.997	1.204
7.152	5.192	22.254	4.129	5.027	2.007
4.35	11.26	5.397	8.082	4.844	1.335
5.146	2.342	15.915	7.822	7.981	2.045
22.774	7.279	8.419	12.192	4.086	1.628
10.176	2.433	7.048	3.534	7.552	2.26
22.83	6.871	9.376	4.61	7.846	1.19
17.664	6.688	12.524	4.171	9.953	1.519
11.089	4.655	16.368	6.336	7.065	1.896
3.707	2.764	15.363	4.862	6.853	1.789
3.081	2.577	18.233	5.122	6.14	1.838
8.426	4.212	17.982	20.5	4.248	1.498
6.953	5.734	3.029	5.26	4.926	1.361
3.487	2.82	19.849	11.291	4.903	1.1
5.71	3.282	5.466	19.181	5.156	1.601
23.954	8.403	6.074	7.39	4.376	2.535
27.545	8.691	13.131	4.207	6.32	1.499
10.63	3.748	23.691	3.024	4.443	2.762
34.156	12.786	40.062	4.145	7.944	1.341
7.97	11.462	11.347	5.197	12.477	1.409
10.135	4.597	12.935	8.771	7.896	2.102
4.58	2.853	14.35	6.55	6.164	1.385
14.896	2.816	5.31	3.443	9.67	1.411
4.347	4.43	13.728	12.47	4.443	1.992
10.081	3.367	13.491	3.878	2.972	2.761
10.909	3.816	6.551	4.333	6.19	1.567
18.047	3.494	18.223	4.969	4.911	2.176
10.478	3.038	12.933	2.974	5.303	2.367
4.039	1.972	16.227	9.056	9.361	2.645
14.5	5.678	14.512	12.523	8.736	1.314
11.092	3.712	14.745	3.94	12.704	1.291
10.482	4.081	16.349	5.775	7.645	2.001
9.027	3.602	23.589	5.323	7.946	1.286
13.361	3.749	24.754	4.526	6.161	1.604
15.335	6.717	8.339	5.521	6.43	2.744
7.566	4.412	13.287	3.267	6.564	1.298
3.816	4.611	21.204	8.036	6.215	2.117
4.785	3.488	3.989	4.217	6.133	2.107
10.008	2.951	14.963	3.787	8.734	2.075
9.809	5.503	12.153	2.567	9.778	2.221
8.006	4.069	11.773	3.38	7.467	1.52
8.866	6.707	12.418	6.305	6.277	2.455
6.254	11.342	7.437	5.278	6.997	1.856
12.744	7.567	23.538	6.359	6.437	1.431
10.227	10.236	6.304	4.934	6.789	1.65
5.589	3.869	29.893	3.28	6.449	1.371
11.38	4.02	5.954	7.522	5.236	2.666
17.048	2.462	10.797	5.663	5.439	2.068
8.368	5.422	17.459	5.935	3.237	1.745
4.012	17.449	18.183	3.093	5.444	2.515
8.624	7.591	15.492	5.253	3.117	1.744
9.2	3.311	15.46	9.783	6.643	2.223
8.378	7.549	18.581	4.698	5.474	1.899
9.055	2.793	7.015	5.04	3.538	1.408
4.314	4.336	13.17	10.429	5.497	1.429
10.495	4.892	10.242	5.904	6.867	1.897
17.323	4.326	22.519	8.582	7.621	1.669
8.479	2.663	8.896	8.942	3.701	1.535
5.112	2.896	12.727	7.348	12.982	1.616
9.72	4.614	14.268	8.562	8.841	4.896
19.008	6.219	17.284	6.911	6.691	1.489
9.896	12.387	20.314	4.227	8.967	1.641
9.876	12.007	5.731	3.978	15.16	1.988
19.172	3.894	19.798	8.256	5.178	1.9
19.779	3.922	12.421	9.475	5.276	2.243
8.755	2.387	16.163	6.508	6.94	1.448
5.161	10.184	12.388	17.617	10.49	1.636
25.335	3.402	16.06	4.291	6.751	1.245
16.816	6.204	7.216	2.926	5.947	1.681
8.555	5.623	10.297	5.347	11.311	1.453
2.845	2.396	16.875	8.356	6.447	2.085
8.118	2.865	15.06	4.241	6.646	1.381
19.799	13.837	14.343	6.854	7.443	1.771
19.997	4.476	6.972	4.042	11.53	1.721
7.3	6.208	9.585	3.249	5.999	2.77
15.008	7.11	10.381	3.351	6.118	1.673
4.279	9.268	13.178	2.918	6.461	1.353
16.301	4.274	12.361	6.558	5.564	1.565
16.802	3.889	14.326	5.243	10.114	2.163
12.55	5.204	22.858	5.779	12.002	1.268
3.366	1.668	13.528	5.106	7.211	1.57
17.009	4.29	19.852	11.564	10.582	2.332
21.888	7.19	1.925	2.663	20.339	1.518
11.745	5.773	13.055	4.954	8.832	2.217
18.728	10.423	14.292	11.82	4.918	1.3
5.064	3.194	10.996	7.438	7.963	1.274
9.827	5.85	14.301	4.109	4.821	1.74
3.779	3.773	7.081	2.56	4.004	1.938
5.407	5.858	25.046	5.484	6.883	1.339
6.846	4.447	6.081	3.275	8.951	2.883
5.233	8.345	9.226	4.805	6.607	1.472
21.91	7.595	15.335	7.422	4.622	1.296
6.463	4.465	17.418	3.595	12.821	2.254
10.787	2.175	17.31	4.118	4.914	1.456
10.146	5.266	22.219	3.508	4.493	2.066
10.01	3.883	19.258	6.666	6.196	1.432
5.524	5.728	6.977	3.209	6.605	2.453
13.609	5.86	15.078	12.268	7.84	2.421
8.84	4.108	20.65	4.395	7.235	2.014
4.446	7.629	11.626	3.16	14.03	1.915
2.903	5.817	17.332	5.321	3.753	1.124
12.175	3.743	8.636	2.306	25.827	1.729
2.53	7.526	19.079	4.751	7.436	1.232
4.175	1.998	6.316	11.346	4.795	1.996
6.793	2.604	15.545	6.379	4.528	1.893
4.639	8.557	10.336	3.185	5.832	1.51
8.737	4.132	15.109	9.081	5.686	2.098
18.264	16.845	14.121	2.954	8.317	1.64
22.811	2.341	13.478	5.679	6.298	2.463
13.292	11.004	8	2.713	8.299	1.482
4.929	5.721	21.317	5.043	9.501	1.753
8.904	4.317	29.717	8.377	5.569	1.328
13.186	11.038	11.711	5.501	15.45	1.566
2.98	4.173	16.944	3.328	7.482	1.374
6.309	5.75	8.784	6.65	8.85	1.786
10.111	3.046	10.785	4.856	6.529	2.075
21.825	7.285	14.43	6.828	6.972	2.074
19.776	8.191	17.522	5.031	5.465	1.731
5.462	5.336	18.971	5.099	7.665	1.22
26.843	4.679	3.236	12.657	7.638	1.626
5.192	4.621	4.68	5.93	7.735	1.011
14.104	6.766	16.095	6.189	8.456	1.938
3.538	3.958	18.653	3.526	7.236	1.227
3.508	6.298	21.653	14.464	8.871	2.348
9.61	8.375	14.765	10.402	6.127	1.742
9.365	8.662	13.012	2.734	5.994	2.314
9.098	7.849	13.926	4.443	4.857	2.367
8.902	3.086	11.265	4.172	7.064	0.884
13.351	6.013	33.202	12.198	7.639	1.852
12.988	11.792	17.691	3.809	16.459	1.156
4.037	13.102	6.335	6.287	7.621	2.33
1.309	3.002	27.438	9.494	8.206	1.668
10.959	15.835	22.21	3.205	4.614	1.679
10.289	5.586	17.635	13.459	5.822	1.728
7.257	6.896	6.133	3.631	7.254	1.069
12.145	15.739	19.42	6.515	5.11	2.558
5.255	2.025	11.745	4.205	4.764	2.209
40.784	9.006	10.817	14.65	3.853	1.634
14.694	3.938	16.237	5.536	7.318	1.656
20.341	5.301	17.076	3.472	3.386	1.807
10.132	8.594	2.831	6.637	4.385	1.184
2.089	5.1	19.909	6.349	7.415	1.051
5.233	3.007	15.593	7.444	12.396	1.523
5.28	10.166	13.417	3.774	10.501	1.04
9.252	8.146	18.086	4.915	4.103	1.499
12.995	4.189	8.286	4.008	4.57	1.228
19.179	4.766	13.869	2.249	5.126	1.941
8.237	20.126	13.115	4.915	9.618	1.748
7.132	10.186	24.216	6.499	5.432	2.825
7.344	7.331	15.448	4.549	7.166	2.862
13.256	3.99	11.094	8.417	8.872	1.582
4.22	10.721	16.387	9.533	6.714	3.097
13.945	4.197	17.211	5.501	5.225	2.799
9.422	6.278	21.317	5.296	19.116	1.588
6.92	3.26	16.749	3.93	7.672	1.798
5.849	8.261	20.895	6.86	4.396	1.618
6.299	6.461	14.111	5.704	8.714	2.146
21.991	5.913	9.167	7.784	4.289	1.796
12.346	4.778	16.425	4.491	7.517	2.02
6.428	3.806	10.944	3.596	9.036	2.015
7.658	8.986	11.574	7.793	8.252	1.582
13.657	5.749	10.771	6.135	8.149	1.938
15.363	4.788	15.449	3.501	14.001	2.316
19.759	3.524	15.328	3.788	9.944	2.453
2.881	4.804	11.843	5.761	8.525	2.024
3.591	5.805	5.827	5.866	6.553	2.229
16.17	5.146	12.473	2.862	6.957	2.058
6.401	3.926	20.194	13.873	6.81	2.446
5.666	6.206	9.049	2.881	8.015	1.825
2.538	5.242	21.697	9.717	5.978	2.055
4.289	6.779	19.239	11.966	7.026	1.433
4.846	5.794	25.695	2.813	10.414	1.725
15.303	7.779	15.992	5.033	7.304	1.844
11.385	5.854	14.904	10.589	11.364	2.653
11.388	9.458	12.079	5.895	9.199	1.846
7.414	4.504	11.271	3.761	11.891	1.675
18.018	8.699	15.332	7.79	5.648	1.771
14.918	6.008	16.873	5.795	5.684	1.53
4.522	3.6	26.435	10.43	3.644	2.614
16.574	4.744	6.251	3.262	7.874	1.621
4.229	1.615	8.125	4.624	9.763	2.114
8.988	4.734	25.063	16.458	4.268	1.981
7.599	4.71	13.364	4.966	7.872	1.239
7.109	7.301	9.996	11.673	9.926	2.645
9.453	6.636	15.354	3.899	7.637	2.277
17.417	4.997	10.061	7.593	7.173	2.037
15.558	3.308	16.47	4.551	5.623	2.04
12.511	4.132	15.094	10.928	6.615	1.248
6.399	3.774	20.916	4.957	8.203	1.712
8.629	4.963	10.227	11.328	6.169	2.972
5.433	3.384	13.317	2.684	3.034	2.696
7.979	5.113	19.637	4.061	4.831	1.867
24.376	4.461	10.946	4.537	8.635	3.466
6.566	4.663	16.584	7.107	5.088	2.604
7.952	11.262	34.09	5.028	7.459	2.311
12.572	4.48	11.227	5.67	6.009	2.238
20.014	6.436	18.687	6.782	6.18	1.226
25.952	2.22	14.771	4.214	4.782	2.129
21.416	9.566	14.968	5.585	10.026	2.039
3.494	8.493	16.128	5.631	4.836	1.498
10.124	12.567	20.649	4.301	7.569	1.323
14.352	8.617	9.71	3.654	8.776	2.062
7.446	5.019	11.318	3.134	5.029	2.657
23.49	7.023	27.966	21.744	8.876	2.56
12.744	2.212	22.91	3.098	6.843	1.594
4.145	7.551	13.537	4.993	6.408	2.142
11.51	6.839	12.656	3.099	9.478	2.972
9.715	8.817	21.416	2.611	12.978	1.775
9.187	4.512	23.085	3.507	9.817	3.304
6.542	5.726	16.94	6.828	5.246	2.156
12.058	5.719	1.706	5.053	5.226	2.792
9.972	3.853	14.189	10.048	4.073	2.033
6.117	5.445	10.639	5.689	5.922	1.803
13.056	3.684	17.938	5.915	6.51	1.613
3.195	4.261	10.616	11.767	8.448	2.029
25.861	6.223	16.083	6.738	7.28	2.71
17.761	5.752	20.24	3.24	3.441	2.572
11.448	3.339	13.468	7	6.65	2.047
6.446	5.447	8.233	3.502	6.788	1.972
17.663	3.537	19.669	9.792	10.016	2.995
4.579	8.409	15.102	5.251	5.979	1.667
28.272	4.009	18.92	5.45	9.901	1.824
6.549	5.285	14.131	7.509	4.952	2.795
21.279	3.69	21.121	4.604	13.591	2.145
13.806	3.275	10.549	8.305	10.904	3.102
10.441	3.72	10.109	5.066	7.981	1.602
6.473	9.905	16.295	7.252	4.589	3.905
5.431	4.702	8.302	4.947	8.221	2.139
6.6	3.82	12.103	11.029	4.175	1.637
14.983	5.167	16.568	2.746	5.725	1.74
3.627	6.756	15.546	3.222	6.008	1.344
4.325	4.267	32.428	7.022	5.111	1.988
23.584	4.336	20.935	9.774	4.953	2.109
5.106	4.241	15.953	4.617	9.011	2.122
14.393	3.868	8.922	6.803	9.768	2.928
7.133	6.064	9.328	4.507	9.854	1.907
5.421	8.112	20.1	14.834	8.363	2.86
6.859	4.196	17.346	7.071	13.061	2.227
11.352	3.107	17.862	10.002	3.909	1.571
3.065	8.987	10.635	5.006	9.047	2.388
7.76	9.835	10.09	6.636	3.591	1.992
15.218	3.345	7.219	3.267	9.518	1.81
9.127	3.539	12.851	3.481	7.572	1.741
8.939	7.845	4.546	9.023	5.416	2.016
3.976	3.399	11.283	4.497	5.497	1.526
8.936	5.643	19.811	5.791	10.601	2.104
7.479	5.762	19.288	7.346	6.641	3.202
12.491	6.392	20.61	6.474	4.539	1.787
7.205	5.937	14.37	4.367	6.698	3.392
9.025	2.848	8.984	2.891	7.095	1.35
13.994	4.365	16.789	6.843	4.294	2.581
11.954	3.985	10.573	3.417	5.361	1.787
6.947	7.109	9.706	5.747	7.313	2.237
8.373	4.747	26.261	9.308	5.98	2.675
11.552	7.35	14.44	5.026	9.342	2.884
3.165	4.447	18.286	7.389	12.482	1.978
4.005	2.862	6.778	9.313	8.453	1.71
10.634	7.287	16.508	13.589	3.801	2.317
30.211	1.915	13.841	4.317	7.801	2.238
5.444	3.5	8.829	9.827	8.763	3.071
9.362	5.096	18.212	3.491	5.05	1.559
14.975	3.515	18.61	2.44	14.336	1.296
4.305	6.319	13.445	5.585	5.424	2.446
11.714	2.558	9.364	4.129	5.255	2.228
5.218	1.707	8.494	5.083	10.312	1.584
19.361	4.375	13.86	5.361	7.733	2.152
12.246	6.918	17.777	12.082	4.994	1.783
4.85	17.193	9.224	5.262	5.59	2.291
5.477	9.631	8.518	4.744	3.796	2.489
16.062	7.812	29.76	4.351	8.455	2.236
6.684	8.581	19.584	4.741	9.17	1.462
21.133	4.564	22.293	5.389	8.164	1.921
6.351	5.06	15.068	4.323	7.149	1.702
4.666	7.659	12.369	13.431	10.157	3.064
11.954	5.841	22.478	6.388	5.146	1.489
2.93	5.314	20.121	2.719	5.603	2.184
8.541	1.283	16.404	6.755	9.282	1.373
5.624	2.642	14.868	5.838	6.14	2.739
7.385	6.022	21.398	6.06	4.564	1.317
8.53	10.645	10.795	2.66	8.878	2.352
8.592	3.878	8.611	6.198	4.767	2.585
6.982	6.251	21.444	7.11	7.556	2.745
9.376	3.837	33.478	7.975	3.624	1.571
10.216	8.449	11.124	3.098	4.194	2.286
2.259	4.092	11.081	4.789	8.162	2.36
8.641	5.307	10.403	4.267	8.133	1.773
6.743	4.131	15.041	3.494	6.185	1.826
6.462	5.812	12.145	6.72	3.814	2.596
8.756	2.526	16.836	8.487	5.443	1.709
33.155	7.19	21.193	16.832	3.555	1.661
3.588	9.512	10.772	12.859	7.303	3.048
3.376	3.321	14.336	5.312	10.358	1.456
5.567	8.125	25.632	3.56	7.404	3.185
18.105	7.634	17.203	4.877	4.525	3.103
17.857	5.001	22.355	4.521	8.442	2.721
14.121	3.809	6.849	8.235	6.84	3.301
10.059	7.507	7.37	3.016	8.826	2.665
10.809	4.472	13.877	3.194	6.098	2.588
5.002	4.791	12.745	15.719	4.503	2.651
13.699	2.853	18.708	10.594	6.158	1.908
6.477	4.815	20.354	5.222	6.465	2.191
9.179	3.931	6.686	12.751	4.083	3.382
8.879	9.423	19.403	3.739	4.456	3.072
7.265	4.85	12.121	7.151	5.009	1.537
7.44	11.294	15.963	9.09	4.291	1.814
2.852	5.129	8.605	6.407	5.743	1.574
34.25	5.229	11.801	4.629	6.81	2.473
12.73	15.364	16.055	8.039	7.664	1.524
9.098	8.414	28.492	3.151	8.194	3.526
6.379	5.549	8.435	2.309	5.924	2.088
7.391	5.148	7.621	9.182	5.481	2.162
35.205	7.181	8.246	4.58	5.698	1.627
19.087	2.67	30.562	3.043	5.037	3.027
18.229	8.78	12.34	10.609	13.859	2.346
5.021	4.771	6.702	6.757	5.462	1.776
13.441	5.194	23.332	7.365	5.003	2.077
6.016	2.769	10.689	10.151	5.783	2.119
6.025	7.376	20.011	7.504	6.058	2.751
8.314	4.841	1.033	12.76	3.868	3.735
18.587	4.505	24.483	4.906	5.601	2.613
13.854	7.948	23.276	5.737	5.465	1.623
29.27	10.168	16.953	8.243	4.193	2.67
4.629	6.931	20.724	10.858	4.937	3.789
4.109	10.597	15.185	4.807	4.052	1.448
5.644	3.242	24.019	3.152	5.007	2.495
9.546	3.989	15.085	5.467	7.797	1.593
7.216	9.525	14.971	7.393	4.45	1.414
5.592	7.863	16.011	6.123	4.806	1.742
10.559	3.001	6.873	4.325	3.907	1.437
16.433	4.036	22.825	4.427	5.853	1.67
8.702	4.78	11.747	6.967	4.661	1.773
11.623	5.087	6.611	10.536	6.614	1.516
5.006	8.552	11.807	10.868	7.029	3.614
7.934	5.677	7.428	4.207	5.732	3.39
6.218	10.404	7.356	4.705	10.324	2.385
7.281	12.981	26.204	6.402	4.153	1.649
14.002	9.863	11.98	4.713	4.622	4.315
6.645	4.602	11.501	4.608	6.355	1.981
17.061	7.789	34.328	6.363	10.838	1.62
30.444	6.999	21.003	4.481	6.339	5.822
6.362	3.242	14.345	6.36	7.976	1.84
1.98	2.922	14.836	2.893	6.589	1.134
7.416	4.263	21.62	3.881	6.77	2.221
10.317	5.177	10.838	13.749	4.162	1.583
19.949	6.853	7.86	4.955	7.73	2.309
12.116	5.395	18.269	5.337	6.289	2.536
25.33	1.698	13.998	5.294	5.437	1.486
6.836	5.996	8.249	7.184	6.539	1.972
11.733	5.719	17.275	11.306	10.223	1.894
9.847	4.447	9.738	3.164	5.989	3.692
7.664	4.329	14.37	2.632	4.671	1.905
4.861	5.918	24.28	2.928	4.326	1.832
12.583	3.712	8.978	7.28	4.567	1.519
5.432	5.707	13.881	6.301	5.92	1.897
3.965	2.584	6.527	10.111	7.896	1.768
6.217	4.299	24.662	8.571	7.358	2.958
10.431	5.144	21.585	6.041	8.131	2.865
11.685	2.215	3.434	6.079	6.781	2.797
9.044	5.288	14.327	5.046	4.786	1.328
19.685	5.537	5.386	5.831	5.62	2.098
4.408	1.429	17.902	9.12	6.771	2.121
9.049	4.351	18.891	2.971	3.458	2.845
6.91	8.068	13.142	3.218	6.318	1.944
14.543	8.138	17.205	3.232	10.607	1.309
17.09	4.384	12.871	5.36	4.316	1.911
5.404	10.229	21.192	8.242	6.141	1.178
5.418	1.991	16.666	5.227	6.168	1.838
6.764	8.567	13.606	18.629	6.859	1.642
5.008	3.042	20.661	6.557	7.669	3.189
6.975	8.65	14.42	5.754	6.59	2.174
9.121	6.138	18.037	6.207	4.736	1.764
19.467	1.479	24.038	3.423	4.237	1.629
9.978	3.878	8.955	4.57	6.624	2.79
2.018	7.889	25.02	5.956	2.971	1.896
8.592	4.271	12.052	15.079	4.965	3.146
4.841	7.034	37.11	5.519	5.407	2.76
18.477	6.368	15.296	32.103	3.779	1.979
8.123	4.381	11.667	3.95	14.973	2.218
23.669	7.507	19.207	5.126	11.443	1.917
6.177	7.444	14.211	3.676	9.046	1.691
5.109	7.42	14.699	19.893	8.477	2.304
29.5	8.283	14.646	7.786	7.411	3.802
3.778	8.159	11.847	3.425	6.076	2.429
3.608	10.038	17.96	11.183	8.431	2.722
3.3	3.547	16.02	6.383	7.216	1.349
2.277	8.77	17.196	13.134	6.284	1.982
12.456	6.258	15.853	8.044	7.652	2.493
2.451	5.628	27.189	2.92	7.706	1.709
4.445	2.984	21.122	3.399	5.977	2.745
16.279	8.116	13.663	3.031	6.449	2.492
12.78	4.696	19.786	5.958	6.682	1.942
5.321	1.675	10.489	5.949	4.436	1.678
6.754	10.222	9.956	5.375	7.377	2.028
10.357	1.929	11.919	8.654	8.762	1.833
7.218	6.019	11.997	5.721	9.019	2.55
3.733	11.306	20.173	3.641	4.092	2.993
15.233	2.447	11.32	9.893	6.711	2.738
3.811	7.884	3.611	11.405	5.333	1.586
6.248	11.916	14.069	5.679	6.18	1.579
51.837	6.126	14.367	6.518	8.493	2.154
17.777	7.777	13.121	5.217	4.782	3.626
10.419	4.791	16.953	4.001	3.35	1.602
5.806	6.319	9.29	3.154	4.204	3.169
1.999	2.758	11.759	5.811	5.01	1.934
5.003	7.665	9.497	4.37	8.393	3.628
8.555	4.881	13.092	5.126	3.557	2.48
14.995	6.576	6.908	7.299	4.329	2.284
5.821	5.324	17.652	9.641	5.23	1.831
10.668	5.642	21.262	15.181	6.125	2.919
9.691	10.67	17.003	2.965	8.226	2.46
11.84	7.421	15.844	29.847	7.902	2.051
23.835	7.844	11.437	9.99	6.948	3.256
15.874	3.293	8.947	3.929	8.064	1.566
14.741	3.076	19.626	4.358	5.069	2.499
14.381	9.073	16.391	2.871	5.481	3.112
6.442	6.567	7.478	4.792	5.545	2.262
9.425	5.182	18.312	5.951	5.724	2.551
30.082	3.68	11.03	3.42	8.159	1.685
8.953	3.218	12.57	2.586	6.432	3.803
6.012	6.551	14.99	5.631	7.622	1.947
2.563	4.695	13.048	3.173	7.23	1.533
8.024	13.104	20.922	8.786	4.718	2.205
16.324	6.248	28.971	4.019	7.42	3.637
11.457	4.674	6.867	3.586	12.369	1.313
9.761	6.776	14.701	3.393	9.505	2.671
2.869	8.393	18.67	3.269	8.366	1.545
2.615	4.245	14.992	3.928	7.177	3.754
9.974	2.717	6.762	5.302	8.105	1.807
9.128	1.9	7.214	4.365	6.076	3.664
3.973	3.199	13.303	7.62	5.427	1.624
7.769	7.739	9.131	12.303	6.637	1.939
10.762	6.689	11.055	7.58	6.699	2.167
9.085	5.285	20.946	6.498	6.02	1.987
12.681	6.866	16.81	3.734	6.354	3.277
35.344	3.885	18.346	5.239	6.316	2.123
4.915	9.363	16.038	3.145	6.97	3.368
12.094	15.019	20.255	6.496	5.888	2.245
6.212	4.213	25.441	6.759	8.341	1.59
8.831	7.335	13.495	7.008	6.598	3.666
2.646	2.626	15.79	4.285	5.478	2.528
9.296	4.89	15.897	8.145	7.288	2.522
8.535	5.385	21.163	4.176	4.657	1.822
5.355	4.048	14.393	6.505	6.137	2.205
13.151	13.557	6.402	11.711	7.047	1.542
21.239	7.38	18.542	4.801	6.814	1.938
4.962	2.76	16.766	5.941	6.33	2.072
4.54	4.309	14.272	4.329	4.692	1.813
7.681	3.828	11.713	5.51	8.372	1.316
25.979	5.674	22.035	7.059	9.674	1.846
2.011	11.196	9.519	8.817	5.498	2.243
9.793	11.492	11.257	8.695	9.158	2.167
4.707	11.046	6.934	3.336	5.884	2.887
6.044	6.783	11.536	4.07	6.527	2.06
4.423	6.911	30.049	3.959	8.144	1.993
11.057	9.48	16.746	2.935	4.831	2.857
3.939	7.141	14.109	6.112	7.688	2.234
3.356	21.623	31.552	3.646	5.448	2.252
6.909	7.792	13.308	2.856	6.666	2.954
15.012	17.373	17.068	4.077	4.559	2.485
6.391	13.712	10.87	4.93	6.637	2.096
22.898	2.33	15.847	8.344	7.577	1.754
7.121	6.194	21.635	4.102	6.77	2.59
7.013	3.825	20.532	6.562	8.392	1.488
8.759	3.296	22.336	4.49	7.447	2.593
3.936	5.853	8.777	3.212	6.491	1.869
24.347	7.222	18.868	5.772	20.439	2.043
3.341	6.355	18.318	7.332	6.814	1.759
4.761	4.424	11.435	2.474	9.696	3.192
13.65	6.165	11.96	4.164	11.159	1.784
10.927	13.159	15.361	9.181	9.094	2.286
10.478	4.854	23.199	7.689	5.352	2.709
1.929	4.399	11.538	2.855	5.479	3.674
18.424	8.846	14.793	5.276	5.107	2.068
8.241	4.778	17.523	12.263	5.46	2.259
7.031	3.82	10.16	2.342	6.291	2.29
10.455	2.839	10.473	4.339	5.008	2.702
5.72	5.216	14.663	2.718	8.063	1.995
6.945	7.83	3.909	1.966	7.346	1.738
11.593	10.244	14.953	2.051	3.736	1.839
11.12	14.736	11.961	4.979	9.166	1.884
9.861	8.727	21.182	7.092	4.542	1.563
11.232	3.115	27.854	3.743	5.657	2.38
2.976	3.606	28.46	5.69	5.678	2.543
5.655	2.173	9.488	3.529	6.823	2.296
5.747	10.445	15.053	11.372	6.085	2.86
17.323	11.233	22.616	3.912	7.948	3.013
6.91	3.333	12.408	5.245	9.013	2.18
11.606	15.537	20.543	3.316	8.07	1.713
6.184	7.642	18.04	3.908	10.906	1.741
15.444	4.496	12.736	6.395	6.938	2.239
9.597	7.817	21.298	2.35	8.241	1.947
19.645	11.053	11.942	3.842	5.528	2.309
5.113	7.011	11.535	4	4.976	2.263
15.237	7.684	26.33	8.887	7.65	4.309
8.279	5.879	8.686	8	7.756	2.322
2.591	3.839	11.38	5.789	7.142	2.63
14.207	3.56	16.698	11.772	5.157	2.5
6.447	4.763	13.21	7.835	3.582	2.726
7.97	6.976	21.961	4.397	4.511	2.215
4.411	7.248	12.265	10.959	6.789	5.012
8.928	7.613	14.29	5.303	5.42	3.989
7.888	9.049	16.959	4.126	5.222	2.631
4.736	4.911	20.672	3.057	6.709	2.267
11.197	4.526	14.945	3.516	4.898	1.953
2.84	8.646	14.107	4.008	5.209	1.837
14.589	8.699	5.504	16.773	6.644	1.545
7.679	7.549	12	4.252	4.172	1.456
5.606	4.643	14.203	2.492	12.961	1.706
3.822	12.526	8.954	6.33	10.102	2.364
5.266	4.375	10.024	4.128	6.768	2.503
3.106	5.77	14.692	5.724	5.204	2.272
13.129	5.046	9.801	13.116	7.632	2.194
8.892	5.839	10.607	13.811	5.324	2.452
6.359	5.512	10.992	10.614	7.499	2.204
7.292	4.444	9.706	3.885	12.4	2.43
7.101	5.54	14.587	4.799	8.715	2.302
17.862	4.157	14.387	10.737	7.303	2.311
9.622	4.283	21.487	8.401	11.355	2.197
4.939	5.167	11.591	2.659	5.788	2.359
14.816	4.826	17.126	4.62	6.041	2.364
1.85	4.777	4.078	3.571	3.999	1.955
8.872	4.338	10.757	3.448	6.123	1.512
13.613	3.232	10.487	4.664	12.906	2.607
4.584	4.461	9.974	5.154	4.981	2.415
8.769	5.141	7.725	9.958	8.637	2.745
5.547	3.319	19.233	7.508	5.037	3.169
4.376	3.969	13.731	10.623	6.578	1.81
8.859	11.759	12.119	7.095	6.79	2.54
11.14	3.89	14.038	7.87	5.551	2.087
2.349	3.321	22.654	8.464	6.452	2.154
4.937	6.102	5.372	17.179	7.667	2.098
6.341	3.149	15.269	6.515	8.652	1.825
9.934	4.343	14.052	7.67	9.2	4.132
5.535	8.656	8.244	4.625	8.166	2.564
19.932	3.615	24.056	7.514	5.839	1.771
26.308	5.881	15.051	2.821	4.534	2.148
8.791	3.884	17.668	6.526	3.553	1.639
4.296	5.548	7.933	4.418	5.873	1.896
8.046	3.846	8.152	3.35	3.625
5.27	3.69	12.572	8.096	8.331
5.748	3.166	12.965	2.532	8.27
4.951	7.716	7.695	3.088	16.29
2.887	3.323	11.31	2.211	7.09
5.297	7.544	24.779	3.057	4.845
8.666	3.94	12.873	4.911	7.937
11.536	5.716	11.125	4.025	13.327
5.843	6.574	4.502	3.2	5.573
3.113	8.468	18.494	4.682	4.295
12.292	9.298	17.753	4.548	6.291
8.397	3.61	21.491	13.119	6.306
3.837	4.999	11.544	3.755	8.312
4.961	2.323	18.751	2.181	4.659
10.603	7.214	10.791	4.148	5.428
4.058	10.275	25.845	8.264	8.294
3.548	3.076	3.172	3.151	9.063
6.849	3.788	16.805	5.516	5.333
22.592	1.793	10.62	5.543	6.902
5.54	3.865	21.291	4.129	6.771
5.306	6.723	9.876	9.384	5.253
11.11	1.943	15.21	3.242	10.083
5.221	3.265	7.132	5.364	4.365
9.534	5.689	10.618	7.468	6.273
19.621	6.995	16.224	14.059	3.994
7.515	3.853	17.489	8.479	10.88
9.142	7.555	23.902	6.337	8.766
10.397	3.181	18.597	6.034	4.848
20.702	4.467	16.928	5.7	4.972
8.497	4.854	16.265	4.324	6.037
2.547	9.099	25.763	2.854	7.582
3.177	4.581	17.701	6.991	5.946
5.743	3.76	16.052	4.015	9.219
6.629	3.115	13.155	4.158	4.65
3.274	10.009	12.753	3	5.462
17.268	4.7	6.484	6.072	5.443
12.96	3.599	12.587	5.858	5.665
4.766	11.037	20.213	4.993	8.209
22.365	3.76	18.65	3.479	6.647
2.672	3.812	14.579	3.842	8.866
9.874	2.869	14.937	2.044	6.525
26.169	5.789	20.744	2.519	7.764
6.807	2.976	13.411	2.292	10.631
13.445	3.211	17.086	3.973	6.923
18.527	5.079	16.605	10.7	9.584
27.496	7.831	33.033	2.632	8.373
9.414	4.323	14.958	7.263	6.424
18.893	3.224	24.681	3.206	2.553
13.144	5.743	9.751	7.982	4.782
25.644	5.411	5.544	7.599	7.988
11.941	6.806	20.982	3.883	9.619
8.473	7.156	11.712	3.183	4.689
12.236	3.313	11.422	7.953	4.056
8.731	3.702	20.87	6.268	7.44
2.549	6.977	15.046	6.8	7.538
13.544	2.293	16.409	3.597	5.715
18.472	6.847	9.168	16.33	5.61
3.929	3.481	9.047	3.208	5.15
8.468	3.224	22.201	4.619	6.962
17.097	4.982	16.329	7.913	8.244
13.603	3.193	3.442	3.642	7.302
9.415	11.528	16.92	4.18	3.39
8.307	2.652	8.577	5.687	5.505
11.492	4.517	15.674	5.309	5.833
10.626	4.142	10.448	9.724	7.953
15.791	2.006	13.011	2.995	6.499
4.887	4.636	10.684	3.893	5.313
5.779	6.485	16.054	10.349	4.601
7.452	4.489	11.606	7.341	8.387
4.265	6.488	23.313	15.551	5.326
6.904	3.028	9.737	5.112	5.909
2.98	5.579	8.002	6.89	8.198
6.827	2.858	22.16	4.922	5.965
4.382	3.569	13.815	7.955	9.608
7.879	3.989	21.584	4.958	5.717
5.002	5.742	9.346	6.879	9.006
15.997	11.93	22.634	4.855	15.019
5.703	6.736	16.948	4.749	8.074
8.999	4.073	19.242	6.321	6.827
1.645	2.282	4.265	3.345	7.238
12.994	3.673	8.342	4.694	5.836
24.595	2.576	18.57	8.322	6.12
4.584	3.62	21.869	3.219	6.219
6.834	3.502	21.189	8.027	11.636
5.17	7.889	8.596	6.361	7.54
4.066	6.394	17.393	5.67	8.05
2.042	4.015	13.285	3.862	5.4
7.303	4.395	18.689	9.614	4.238
4.921	5.232	16.52	5.048	9.412
9.425	6.1	17.606	3.637	4.519
3.985	2.785	15.588	2.417	4.442
6.372	3.229	25.057	6.725	5.51
12.025	3.534	13.644	7.278	8.004
3.18	4.787	13.797	6.108	4.571
3.825	5.511	4.348	6.249	8.244
11.016	10.642	16.992	8.695	4.729
2.003	4.057	20.65	6.708	10.302
13.552	2.809	30.921	3.826	6.894
21.674	3.342	10.893	7.078	7.109
7.978	4.274	16.775	3.763	6.605
4.076	3.348	9.685	3.53	7.246
15.532	5.232	9.821	6.372	6.207
21.918	4.272	1.86	12.397	9.886
3.729	10.063	19.767	2.981	5.078
1.898	4.748	27.107	2.676	6.568
6.63	4.009	15.496	4.1	8.884
3.697	5.914	7.056	11.47	6.04
4.817	2.062	11.903	3.444	10.128
2.936	2.6	24.297	5.332	8.1
6.472	7.207	17.566	2.47	4.224
5.39	4.375	1.995	3.685	7.02
2.571	2.043	9.638	5.938	5.187
5.172	10.107	10.153	2.159	8.65
6.997	4.616	15.155	6.22	6.802
14.926	10.002	12.984	2.778	12.963
6.438	6.615	50.169	6.007	8.467
10.374	4.851	18.516	4.244	13.735
38.698	5.281	18.405	10.478	5.154
9.041	3.743	14.185	5.536	6.055
6.553	9.625	14.523	3.47	7.603
5.615	8.599	12.361	5.704	4.824
3.306	5.844	8.274	6.791	6.008
5.7	4.82	28.854	4.907	6.481
8.099	9.232	10.605	3.137	5.426
6.915	4.324	3.155	3.431	6.975
11.416	4.142	9.77	7.902	5.814
3.901	4.217	1.538	5.589	5.849
5.315	4.13	19.656	1.873	5.598
6.87	3.281	3.518	9.187	8.946
2.819	20.379	5.31	11.934	5.415
1.262	8.07	20.936	4.788	5.933
7.245	8.896	46.55	4.555	12.258
2.919	6.34	3.918	5.259	7.281
1.954	2.25	20.273	5.678	11.599
5.938	4.824	8.057	4.02	4.792
33.588	5.972	12.657	6.581	8.761
11.395	4.857	19.709	9.247	43.623
8.112	5.397	19.953	7.39	6.22
8.199	13.133	22.094	3.081	9.28
7.206	8.701	8.206	4.192	7.041
6.639	3.192	30.462	7.179	12.801
5.904	5.349	19.606	7.546	8.009
6.986	2.159	23.992	3.805	5.621
3.921	9.363	9.929	6.43	7.99
13.68	2.814	12.33	4.91	8.478
14.494	7.656	15.854	8.537	7.587
5.757	8.055	11.378	5.344	6.952
4.709	6.218	11.989	5.772	6.922
24.156	4.772	13.868	8.283	5.196
9.912	4.402	12.923	4.587	6.044
3.715	6.996	21.227	4.679	7.126
10.729	5.42	11.314	5.551	6.873
15.432	3.687	9.147	3.562	6.945
11.526	5.964	8.228	14.242	6.144
3.815	2.479	21.465	4.226	8.952
10.059	10.382	13.925	4.161	9.552
8.35	7.505	10.023	8.762	5.141
5.627	5.401	8.484	5.25	5.545
14.051	3.685	17.326	4.767	5.905
3.763	2.838	19.052	6.268	6.659
9.098	5.593	15.675	7.918	5.139
24.549	6.997	12.038	5.645	6.583
14.374	8.625	10.938	3.498	9.645
4.925	3.596	14.603	5.294	5.349
6.245	14.608	9.027	4.022	5.32
14.02	4.739	5.376	9.112	5.337
6.495	3.09	12.978	3.565	4.432
6.83	6.819	17.819	3.802	6.82
10.164	6.237	10.707	5.037	5.793
13.972	2.505	20.944	4.337	7.428
9.438	4.113	9.843	3.497	5.067
2.925	8.135	21.28	5.938	5.751
10.04	5.645	15.061	11.288	6.107
6.309	7.903	26.988	5.662	5.137
6.039	4.288	9.813	8.319	5.452
23.988	3.729	29.219	6.899	7.686
8.783	2.373	15.868	8.984	8.457
4.754	2.751	18.318	3.419	4.139
8.351	4.33	6.767	6.103	10.31
6.169	5.767	8.999	3.273	5.504
7.333	7.5	14.089	6.147	12.763
3.004	8.705	10.169	5.22	9.804
3.143	3.467	14.242	7.044	9.731
22.222	6.648	15.886	3.596	6.76
2.884	5.691	22.569	8.959	7.168
6.472	4.142	8.166	3.023	4.732
8.162	4.925	9.274	4.887	4.891
12.695	6.118	8.924	11.414	6.841
25.324	9.804	9.897	5.922	7.764
12.599	2.325	16.948	4.325	4.719
15.255	4.058	6.298	8.798	5.127
12.924	7.155	20.4	4.429	5.612
16.453	10.703	17.321	5.221	7.483
6.411	9.202	11.276	3.35	7.022
9.51	2.667	13.879	4.906	7.91
7.16	3.293	14.611	7.18	3.597
6.274	3.631	10.065	5.793	5.19
5.122	8.702	20.041	10.847	8.17
3.662	7.351	12.094	5.588	8.483
3.218	3.315	24.978	3.809	5.706
8.471	9.072	14.641	4.162	15.083
17.229	6.302	16.148	10.746	5.177
11.312	12.442	20.201	4.744	8.39
3.608	7.065	24.167	8.264	8.128
5.805	5.206	14.17	4.845	5.695
12.086	4.704	11.208	3.578	6.389
8.148	4.658	17.387	2.435	4.039
5.559	3.539	11.031	3.253	7.579
6.265	12.41	21.253	8.616	4.889
4.167	3.349	3.898	6.761	4.258
9.166	6.799	12.374	9.882	4.761
3.446	4.928	4.617	2.43	5.804
6.836	5.809	13.633	5.649	16.93
35.15	4.436	15.594	10.227	4.782
9.268	8.006	17.538	4.755	4.847
14.801	7.614	13.123	2.311	7.351
8.959	4.598	19.127	4.695	6.995
5.727	6.063	24.327	6.002	6.346
15.642	8.925	1.581	9.078	11.957
8.301	2.251	17.8	4.158	6.605
5.677	5.452	18.831	7.095	9.194
12.119	6.188	10.281	5.19	9.246
6.013	8.964	13.541	3.851	5.697
4.025	6.86	25.48	2.244	11.215
4.127	10.259	28.074	7.024	11.027
6.631	8.811	15.422	6.69	4.966
8.034	5.655	5.843	5.598	2.736
20.582	9.146	19.661	4.62	5.128
3.565	4.882	16.084	6.138	6.343
6.682	4.278	20.862	9.521	5.988
14.742	6.342	16.36	2.261	8.622
14.89	3.645	17.808	3.581	18.505
10.788	3.883	21.476	3.956	8.847
6.645	2.386	16.626	10.011	7.203
10.276	3.434	7.304	3.957	4.187
26.602	12.723	16.051	4.254	4.298
11.573	4.283	2.933	5.652	6.97
8.785	5.569	13.459	6.385	4.868
4.788	5.977	23.756	4.941	9.289
5.099	7.08	10.528	4.221	8.71
9.669	14.102	18.8	8.02	4.883
4.078	3.571	16.667	4.383	4.063
3.248	9.27	2.751	3.558	7.877
12.081	3.987	8.624	8.192	7.435
4.104	4.474	8.421	3.744	5.697
5.005	5.368	22.33	5.804	5.158
10.234	4.096	16.338	3.308	8.397
5.517	3.259	18.593	5.462	7.906
10.406	1.39	11.626	6.185	6.306
5.427	8.977	15.612	4.177	5.094
20.539	5.475	15.14	3.554	8.521
6.964	8.491	16.183	8.875	6.969
9.223	5.213	3.814	5.778	5.866
14.15	13.375	6.378	4.971	4.059
7.371	12.973	11.044	7.315	4.05
13.617	9.49	17.441	6.639	6.262
5.76	5.143	21.454	3.939	3.926
8.168	9.924	6.204	5.218	6.547
2.855	10.025	22.213	3.215	10.048
7.446	7.541	18.92	6.271	7.296
24.057	11.687	1.158	4.806	10.049
9.295	9.528	14.306	5.382	5.631
12.446	4.856	14.946	4.521	6.344
9.571	3.374	10.822	9.854	8.681
11.845	14.037	11.38	4.793	5.124
4.679	5.602	20.914	2.696	13.858
10.332	4.575	14.089	5.868	6.169
11.694	5.086	13.675	7.609	4.562
2.489	5.8	9.387	5.102	4.449
6.617	10.543	11.375	6.034	4.859
4.493	6.109	23.015	2.956	2.845
6.144	2.668	11.998	4.275	5.081
8.817	10.964	8.581	3.187	13.126
10.004	5.231	17.706	3.843	3.279
5.522	5.089	18.945	6.877	6.82
5.365	10.214	31.188	5.705	10.107
4.294	4.934	11.655	3.59	5.415
16.517	3.846	11.55	4.264	8.936
7.858	10.336	8.332	5.043	4.415
3.189	6.613	21.789	11.8	5.512
8.665	9.135	23.489	4.105	6.43
13.244	1.274	22.907	2.918	5.375
12.81	4.787	16.592	7.019	4.868
14.699	5.501	12.576	6.511	15.512
28.22	4.359	13.533	11.035	11.104
10.445	6.272	22.389	4.038	4.87
5.711	2.927	11.821	6.231	4.029
10.581	14.892	14.004	6.383	5.032
3.157	8.618	21.142	6.579	6.542
14.797	3.964	23.062	4.522	3.61
20.133	8.651	11.656	8.719	7.246
3.062		11.047	6.898	4.066
6.224		20.325	4.798	4.074
7.723		13.301	2.877	5.222
4.307		15.016	5.646	13.707
10.147		19.424	3.529	3.524
26.315		15.502	2.736	14.08
6.194		12.331	3.507	9.559
12.176		14.415	6.292	7.705
21.017		9.425	4.802	3.817
4.908		23.206	4.824	8.679
3.548		10.308	3.781	6.075
17.104		14.389	7.16	8.672
4.556		28.074	5.439	9.207
8.276		8.956	8.444	7.606
8.477		6.324	3.386	4.374
14.267		27.119	3.222	5.747
14.378		21.161	2.908	6.872
5.523		11.742	4.989	5.059
2.734		29.871	4.537	8.924
26.301		11.964	5.036	5.678
3.504		15.577	7.506	4.945
3.979		14.805	3.957	6.828
6.408		24.32	2.394	4.27
5.17		22.553	12.625	9.728
8.093		15.417	11.526	5.363
15.347		8.373	3.557	6.478
3.044		22.019	5.475	9.043
3.632		26.821	5.011	10.144
22.762		12.665	3.892	6.177
17.188		2.641	3.328	8.209
5.136		31.014	4.489	5.616
12.286		12.411	3.436	8.511
9.096		18.353	4.184	5.818
		13.836	2.626	6.975
		23.872	3.39	4.912
		17.3	6.862	8.184
		18.143	5.973	15.061
		3.334	12.547	7.786
		16.198	6.191	5.815
		25.067	13.89	7.45
		17.954	6.948	13.597
		14.186	2.555	5.354
		16.115	4.152	7.3
		16.475	8.421	5.587
		10.774	6.837	4.595
		3.381	6.118	7.866
		2.547	6.652	9.287
		13.689	6.401	8.373
		15.192	3.803	6.876
		9.205	8.119	6.596
		3.576	5.325	5.933
		7.445	9.174	4.773
		19.038	3.565	9.484
		17.84	5.8	6.719
		15.766	2.382	7.379
		13.686	6.762	7.106
		21.13	6.894	6.037
		6.652	3.53	6.087
		16.657	4.08	10.147
		15.345	8.172	12.177
		21.761	2.948	6.234
		23.001	4.956	4.674
		13.166	6.657	4.198
		25.29	3.94	8.929
		15.637	3.745	5.585
		14.363	3.298	13.41
		2.625	6.755	4.433
		1.767	13.548	11.257
		21.923	4.231	7.221
		17.733	4.052	3.873
		19.465	7.854	4.622
		14.792	5.342	4.966
		20.175	6.005	6.679
		15.561	10.267	7.225
		8.293	8.736	5.224
		14.442	4.216	6.653
		8.589	6.33	7.461
		11.529	3.849	6.281
		14.563	7.362	4.503
		20.095	3.432	5.783
		19.773	4.182	4.646
		16.709	7.618	6.784
		5.514	4.402	9.574
		6.885	6.325	7.803
		3.951	12.077	4.828
		9.412	4.324	4.504
		13.054	7.657	8.112
		2.512	3.861	6.788
		9.335	3.282	10.163
		10.719	4.999	7.175
		13.911	7.719	9.664
		12.214	4.612	17.644
		16.072	7.235	5.987
			7.145	7.063
			3.66	3.949
			4.179	10.572
			3.099	4.434
			8.37	7.174
			3.261	5.474
			4.777	10.912
			5.812	5.506
			3.236	6.697
			8.859	4.517
			7.758	5.423
			5.792	7.357
			7.739	4.238
			7.277	8.34
			6.873	4.702
			6.524	11.328
			5.985	8.259
			3.684	6.808
			5.046	5.223
			4.822	8.935
			3.638	7.765
			2.877	7.285
			4.68	6.044
			3.689	8.463
			4.977	4.297
			5.192	6.958
			4.629	5.096
			6.445	6.2
			5.602	13.597
			3.394	3.915
			6.552	9.941
			14.535	14.841
			6.693	6.834
			4.208	5.441
			3.586	7.304
			5.151	12.065
			9.708	5.445
			3.078	11.658
			5.143	3.391
			3.302	4.73
			4.621	9.921
			12.416	10.572
			6.276	4.295
			3.207	6.487
			5.432	7.986
			3.003	3.889
			3.995	6.254
			9.28	5.943
			5.123	7.003
			2.62	5.431
			4.315	3.854
			5.5	5.449
			9.353	6.28
			4.235	4.993
			6.167	4.134
			8.674	7.304
			5.546	5.308
			5.033	7.347
			3.253	14.821
			4.211	3.905
			7.145	7.32
			10.621	4.629
			5.573	3.786
			9.876	4.506
			4.301	5.219
			9.254	4.149
			2.814	5.992
			6.506	9.016
			6.311	4.648
			4.491	5.925
			2.874	8.475
			6.351	5.237
			3.624	6.35
			5.721	4.621
			4.441	10.133
			2.59	6.216
			5.897	7.877
			4.976	10.209
			4.484	7.597
			3.954	12.166
			5.096	13.293
			7.054	4.204
			6.278	7.968
			8.186	4.233
			3.914	4.157
			3.665	6.357
			5.254	8.999
			4.325	6.384
			3.675	3.816
			3.746	3.261
			3.666	3.92
			5.462	9.317
			3.808	5.973
			5.381	3.631
			2.938	12.441
			3.457	6.021
			5.18	8.399
			3.734	6.069
			3.9	7.686
			6.034	6.07
			7.379	7.013
			4.866	7.214
			4.676	5.149
			4.376	3.218
			7.277	6.047
			4.683	12.948
			4.666	12.142
			5.33	7.022
			4.049	5.789
			4.623	6.453
			3.14	5.769
			4.565	6.285
			7.219	5.929
			6.37	6.507
			5.635	5.653
			5.089	7.265
			5.943	5.784
			3.851	4.488
			4.259	5.149
			4.477	5.487
			7.469	5.982
			7.216	5.506
			4.722	6.585
			5.759	8.407
			9.404	3.969
			5.362	8.086
			4.837	4.895
			2.505	6.123
			4.341	6.182
			5.034	5.016
			3.286	8.043
			4.895	5.489
			8.353	5.291
			5.305	11.72
			6.569	6.622
			3.568	7.112
			2.585	5.529
			3.517	11.789
			5.801	4.741
			2.349	6.372
			5.222	8.392
			4.148	5.066
			5.425	3.733
			6.224	6.983
			4.221	5.133
			4.448	4.082
			16.558	5.58
			5.376	5.266
			3.319	10.523
			4.9	6.019
			4.995	4.455
			5.413	8.945
			4.64	3.53
			3.615	10.266
			5.703	8.292
			3.654	5.871
			4.449	3.783
			3.613	4.872
			4.251	6.482
			5.871	4.306
			5.307	5.237
			4.852	5.726
			6.213	11.56
			4.513	12.64
			6.556	5.678
			2.972	6.784
			2.816	4.855
			3.708	3.594
			5.945	8.042
			5.412	5.293
			3.279	4.134
			3.059	5.435
			5.574	6.695
			4.869	7.64
			4.748	11.253
			11.772	3.696
			9.119	6.635
			8.198	6.339
			3.702	5.542
			4.502	7.947
			9.706	8.362
			5.413	3.609
			7.153	4.191
			6.395	6.935
			4.815	7.926
			6	6.997
			2.65	8.853
			4.445	4.405
			4.524	5.335
			3.745	5.01
			4.058	3.996
			4.916	8.701
			4.302	3.346
			3.428	6.562
			6.716	5.087
			7.882	12.804
			3.298	4.903
			3.502	5.033
			2.911	6.937
			3.251	7.998
			3.09	7.173
			2.964	9.149
			4.763	5.42
			9.114	5.207
			6.315	5.598
			3.92	3.885
			3.882	4.997
			5.455	5.917
			5.836	7.344
			4.922	10.111
			18.89	7.263
			3.233	5.931
			4.237	5.557
			6.995	6.711
			5.568	5.788
			4.145	4.643
			3.808	5.529
			8.49	5.162
			4.14	10.751
			5.303	9.916
			6.717	8.008
			2.592	9.742
			4.252	10.674
			3.83	6.577
			7.32	4.165
			4.951	8.728
			5.742	7.111
			6.985	7.314
			4.765	7.406
			2.995	4.613
			23.969	4.911
			7.551	8.01
			3.184	7.286
			4.494	8.402
				6.199
				5.85
				5.912
				7.065
				5.386
				3.399
				5.891
				5.49
				8.627
				12.409
				6.631
				3.339
				8.578
				5.808
				3.957
				4.277
				7.884
				3.45
				4.732
				3.66
				5.685
				6.373
				6.687
				7.939
				5.422
				6.597
				5.831
				5.001
				10.295
				6.874
				7.633
				3.498
				3.478
				5.446
				6.36
				4.776
				4.727
				5.085
				5.804
				8.48
				7.644
				4.002
				3.476
				4.565
				3.201
				4.423
				5.504
				6.584
				5.518
				8.873
				8.004
				8.059
				8.129
				4.572
				5.252
				4.472
				4.477
				4.941
				9.95
				5.697
				2.971
				8.615
				3.554
				10.057
				4.828
				3.823
				4.293
				4.254
				7.615
				6.234
				10.642
				7.816
				7.311
				5.787
				10.076
				4.843
				4.703
				4.144
				5.699
				6.053
				6.984
				7.965
				3.628
				8.293
				4.829
				6.811
				6.794
				10.329
				7.628
				6.997
				7.322
				7.455
				7.037
				12.903
				7.401
				8.36
				13.924
				9.225
				6.532
				5.074
				7.119
				6.882
				9.585
				3.442
				8.562
				11.188
				13.096
				6.272
				10.204
				7.88
				6.428
				3.588

## Sheet: Figure 4e
GFP					Enh2-KO					Enh7-3 KO			WT
3.32	2.81	2.63	3.14	3.09	1.3	2.3	2.13	1.62	1.32	1.46	1.35	1.09	1.14	1.02	1
3.21	2.33	2.3	2.8	3.18	1.1	2.35	2.08	1.58	1.38	0.91	1.09	0.96	1.07	0.99	0.97

[truncated: 41 more sheets: Figure 4e´, Figure 4e´´, Figure 4f, Figure 5e, Figure 5f, Figure 5m, Figure 5n, Figure 6e, Figure 7c, Figure 7d, Figure 7e, Figure 7f, Figure 7g, Figure 7h, Figure 7i, Figure 7j, Figure S2e, Figure S4a-a´, Figure S4b-b´, Figure S4c …]
